# Supplementary material for: Identification of Genes under Positive Selection Reveals Differences in Evolutionary Adaptation between Brown-Algal Species
Source: Front Plant Sci. 2017 Aug 15;8:1429. doi: 10.3389/fpls.2017.01429 (PMC5559719; doi:10.3389/fpls.2017.01429)
Supplement: Supplementary file 1 [file Table1.XLSX]

## Sheet: table S1
Table S1. List of genes under positive selection in E. siliculosus, including gene ID, lnL value, χ2, p value and annotation.
gene ID	lnL1	lnL2	χ2	p value	annotation
Esi0023_0095	-1641.88	-1648.08	12.3975	0.000429908	Peptidase M24, structural domain (187) ;mRNA; f:1900066-1907436
Esi0037_0030	-7221.45	-7223.46	4.00553	0.0453512	Cation/H+ exchanger (892) ;mRNA; f:5463127-5475622
Esi0606_0004	-2619.11	-2621.49	4.75948	0.0291373	Exocyst complex component Sec10-like (294) ;mRNA; r:13427188-13433607
Esi0229_0014	-2406.73	-2409.12	4.77296	0.02891	conserved unknown protein (260) ;mRNA; r:6918130-6925066
Esi0233_0009	-2781.98	-2786.43	8.8998	0.00285202	Choline transporter-like (647) ;mRNA; r:746061-757591
Esi0002_0280	-2927.78	-2931.61	7.6527	0.00566874	Protein of unknown function DUF1826 (326) ;mRNA; f:5711207-5713597
Esi0043_0098	-7100.84	-7104.41	7.14141	0.0075324	conserved unknown protein (1139) ;mRNA; r:5577827-5591065
Esi0098_0078	-4876.37	-4879	5.26466	0.0217627	C2H2 zinc finger, ankyrin repeat protein (635) ;mRNA; f:957911-964082
Esi0026_0111	-3761.31	-3764.27	5.9242	0.0149343	ATP synthase subunit alpha-like domain (523) ;mRNA; f:2744536-2753101
Esi0163_0051	-10198.5	-10201.4	5.88309	0.015287	conserved unknown protein (1306) ;mRNA; r:8888076-8894982
Esi0000_0281	-11180.6	-11193.5	25.9904	3.43e-07	Glutamate synthase (ferredoxin-dependent) (1615) ;mRNA; r:4471395-4502622
Esi0398_0023	-2276.7	-2278.82	4.24502	0.0393657	Triosephosphate isomerase, (258) ;mRNA; f:487901-496479
Esi0203_0009	-1642.41	-1645.1	5.39081	0.0202431	4-methyl-5(b-hydroxyethyl)-thiazole monophosphate biosynthesis protein, putative (239) ;mRNA; r:7504688-7509507
Esi0037_0092	-18508.8	-18516	14.3611	0.000150886	P-loop containing nucleoside triphosphate hydrolase (2573) ;mRNA; r:5087372-5106571
Esi0415_0017	-2305.29	-2307.59	4.59722	0.0320239	Aldo/keto reductase (314) ;mRNA; f:1535040-1542120
Esi0091_0069	-3787.1	-3789.15	4.10639	0.0427214	Small Conductance Mechanosensitive Ion channel (460) ;mRNA; f:2936533-2941186
Esi0362_0023	-3021.34	-3023.67	4.66997	0.0306944	Septum formation inhibitor MinC (313) ;mRNA; r:1917384-1922423
Esi0111_0053	-5207.82	-5211.38	7.11622	0.00763895	S-adenosyl-L-methionine-dependent methyltransferase (1031) ;mRNA; r:6760461-6765166
Esi0015_0164	-11092.5	-11099	13.1662	0.000285039	pleiotropic drug resistance transporter (1444) ;mRNA; r:1689571-1718654
Esi0066_0108	-34451.1	-34453.2	4.22275	0.0398855	dynein heavy chain (4849) ;mRNA; f:4776470-4836198
Esi0210_0040	-2181.07	-2183.16	4.17959	0.0409137	Rrp4 is a component of the exosome 3'->5' exoribonuclease
Esi0000_0413	-3607.2	-3609.56	4.71471	0.0299056	dihydrolipoamide dehydrogenase (538) ;mRNA; f:3681281-3687371
Esi0066_0090	-4691.37	-4693.59	4.42725	0.0353695	Methionine--tRNA ligase (838) ;mRNA; r:4627798-4639127
Esi0166_0052	-4088.69	-4091.05	4.72114	0.0297939	Zinc finger, RanBP2-type (619) ;mRNA; r:3669025-3674528
Esi0057_0131	-6377.04	-6382.86	11.6512	0.000641604	conserved unknown protein (710) ;mRNA; r:513-9851
Esi0127_0036	-15187.1	-15189.8	5.41919	0.0199166	conserved unknown protein (3188) ;mRNA; r:153253-185484
Esi0014_0225	-3805.06	-3807.36	4.60657	0.0318497	Baculoviral inhibition of apoptosis protein repeat (510) ;mRNA; f:7326338-7330751
Esi0027_0149	-2450.59	-2453.23	5.27439	0.0216414	Dihydroxy-acid dehydratase, N-termnial part (570) ;mRNA; f:288161-311312
Esi0018_0204	-3165.58	-3168.11	5.07477	0.0242765	conserved unknown protein (390) ;mRNA; f:3867329-3871879
Esi0033_0011	-4361.09	-4367.6	13.0287	0.000306746	Mitochodrial transcription termination factor (577) ;mRNA; f:1472961-1484973
Esi0534_0007	-2744.38	-2747.01	5.27684	0.0216109	Domain of unknown function DUF4414 (1492) ;mRNA; r:11252029-11282295
Esi0016_0132	-1019.8	-1022.61	5.62733	0.0176825	Ribosomal protein L27e (163) ;mRNA; f:607715-614419
Esi0024_0169	-8513.92	-8515.94	4.02311	0.0448809	aspartic protease PM5 (948) ;mRNA; r:5639551-5653074
Esi0113_0075	-4442.9	-4445.05	4.28912	0.0383569	ATP-dependent RNA helicase, mitochondrial, putative (1129) ;mRNA; r:557511-575187
Esi0289_0029	-8388.87	-8391.59	5.44628	0.01961	postmeiotic segregation increased 2 (908) ;mRNA; f:6576062-6583848
Esi0155_0064	-3926.89	-3929.51	5.24853	0.0219653	NADH dehydrogenase (ubiquinone) (544) ;mRNA; r:5822744-5832906
Esi0006_0215	-3599.35	-3601.91	5.11637	0.0237012	WD40 repeat (516) ;mRNA; f:6401684-6406441
Esi0858_0003	-4834.55	-4837.52	5.93773	0.0148201	conserved unknown protein (942) ;mRNA; f:17864974-17872416
Esi0048_0096	-3463.86	-3470.99	14.2514	0.000159945	ATP synthase: assembly factor for F1 component (397) ;mRNA;
Esi0115_0023	-7546.21	-7550.71	9.00885	0.00268675	Domain of unknown function DUF2435 (1508) ;mRNA; r:5612699-5620178
Esi0115_0069	-1808.12	-1810.29	4.33871	0.0372552	Soluble NSF Attachment Protein (SNAP) Receptor (SNARE) (223) ;mRNA;
Esi0013_0091	-2731.6	-2734.06	4.90825	0.0267286	G-patch domain (305) ;mRNA; f:1607550-1609624
Esi0056_0109	-4653.02	-4655.9	5.77183	0.016285	Protein of unknown function DUF974 (536) ;mRNA; f:1556769-1562440
Esi0099_0038	-3597.59	-3599.9	4.61496	0.0316942	Glyoxalase/Bleomycin resistance protein/Dihydroxybiphenyl dioxygenase (411) ;mRNA; r:3938478-3940302
Esi0115_0037	-2482.08	-2486.61	9.06599	0.00260407	conserved unknown protein (839) ;mRNA; r:5683999-5687508
Esi0029_0091	-5402.53	-5404.77	4.48348	0.034224	DNA replication licensing factor Mcm3 (809) ;mRNA; r:535932-547886
Esi0117_0013	-3791.21	-3800.03	17.6399	2.6692e-05	Phosphoribosylaminoimidazole carboxylase PurE domain (443) ;mRNA; f:3326166-3332964
Esi0172_0034	-19925.5	-19921.7	-7.53842	0.0060397	conserved unknown protein (2254) ;mRNA; f:3138657-3159545
Esi0246_0031	-5731.45	-5734.68	6.45317	0.0110755	putative glutamate/ornithine acetyltransferase (ISS) (790) ;mRNA; r:3046375-3051869
Esi0141_0005	-5660.03	-5666.74	13.4064	0.000250762	Alpha/Beta hydrolase fold (568) ;mRNA; r:1018884-1022318
Esi0023_0146	-2491.81	-2493.74	3.84729	0.0498264	NAD(P)-binding domain (351) ;mRNA; f:2159110-2164989
Esi0113_0081	-3367.72	-3369.79	4.12907	0.0421525	Basic-leucine zipper domain (442) ;mRNA; f:628388-634699
Esi0339_0018	-4282.08	-4284.46	4.75776	0.0291665	ATP-grasp fold, subdomain 2 (526) ;mRNA; r:6352294-6358529
Esi0010_0082	-4808.37	-4811.15	5.56833	0.0182882	Similar to tubulin, gamma complex associated protein 2 (1018)
Esi0161_0005	-2926.52	-2929.28	5.51681	0.0188346	S-adenosyl-L-methionine-dependent methyltransferase (464) ;mRNA; r:1767136-1770289
Esi0027_0087	-3389.74	-3402.14	24.7949	6.38e-07	Hydroxymethylglutaryl-CoA reductase (NADPH) (762) ;mRNA; r:702481-711092
Esi0155_0030	-2336.79	-2339.51	5.44986	0.0195699	manganese stabilising protein (326) ;mRNA; r:6011522-6016367
Esi0130_0079	-2215.4	-2217.35	3.90004	0.0482849	catalytic/ hydrolase/ phosphoglycolate phosphatase/ phosphoric monoester hydrolase (362) ;mRNA;
Esi0015_0069	-25507.2	-25509.1	3.96514	0.0464516	Armadillo-like helical (3347) ;mRNA; f:2273037-2312573
Esi0320_0011	-1852.27	-1856.45	8.36569	0.00382372	3-ketoacyl-CoA thiolase (384) ;mRNA; f:4217738-4227215
Esi0311_0026	-1923.07	-1925.76	5.37076	0.0204771	Tetratricopeptide-like helical domain (3011) ;mRNA; r:5241967-5269647
Esi0863_0002	-4673.41	-4669.92	-6.978	0.0082518	AMP deaminase (716) ;mRNA; r:6506378-6511406
Esi0002_0116	-1679.41	-1681.47	4.11804	0.0424281	Destroys superoxide radical to produce hydrogen peroxide (231) ;mRNA;
Esi0018_0102	-3865.71	-3868.49	5.55646	0.0184126	Renin receptor-like (404) ;mRNA; f:4345212-4349119
Esi0054_0097	-1977.67	-1979.73	4.11887	0.0424074	THO complex subunit 7/Mft1 (328) ;mRNA; f:604571-609790
Esi0000_0342	-4316.23	-4318.59	4.72253	0.0297698	Nin one binding (NOB1) Zn-ribbon-like (557) ;mRNA; f:4082775-4087713
Esi0071_0031	-4292.26	-4295.95	7.37586	0.00661052	Histidyl-tRNA Synthetase (C-terminal region) Histidyl-tRNA Synthetase (N-terminal region) (577)
Esi0024_0124	-3379.21	-3381.26	4.08903	0.0431624	conserved unknown protein (529) ;mRNA; r:5383361-5400605
Esi0339_0028	-1458.37	-1463.62	10.5089	0.001188	GTP cyclohydrolase I (257) ;mRNA; r:6397154-6400562
Esi0111_0060	-5958.71	-5961.27	5.13232	0.0234843	conserved unknown protein (851) ;mRNA; f:6795959-6810000
Esi0063_0122	-3475.76	-3477.99	4.44757	0.0349509	Ribosomal protein L1-like (364) ;mRNA; f:6477692-6479488
Esi0026_0095	-3070.24	-3073.28	6.06909	0.0137568	hypothetical protein (332) ;mRNA; f:2630944-2646829
Esi0092_0006	-5001.63	-5006.48	9.68417	0.00185863	AEC family transporter: auxin efflux (507) ;mRNA; f:4478703-4488486
Esi0083_0033	-1913.52	-1917.09	7.13422	0.00756264	hypothetical protein (1518) ;mRNA; f:209227-218741
Esi0048_0062	-2532.9	-2535.31	4.81377	0.0282331	Indole-3-glycerol-phosphate synthase (C-terminal region) Indole-3-glycerol-phosphate synthase (N-ter (388) ;mRNA;
Esi0012_0133	-5483.52	-5486.06	5.0675	0.0243785	Pyridine nucleotide-disulphide oxidoreductase, FAD/NAD(P)-binding domain (928) ;mRNA; r:446434-454566
Esi0120_0004	-2779.99	-2783.63	7.28332	0.00695979	WD40 repeat (249) ;mRNA; f:16690-22256
Esi0187_0017	-2703.34	-2705.49	4.2999	0.0381146	conserved unknown protein (483) ;mRNA; r:645023-652071
Esi0149_0081	-6567.98	-6573.14	10.3156	0.00131908	Non-SMC condensin II complex, subunit H2-like (876) ;mRNA; f:1779419-1789970
Esi0058_0100	-2483.31	-2487.15	7.68139	0.00557931	Peptidyl-prolyl cis-trans isomerase, FKBP-type, domain (311) ;mRNA; f:277129-282540
Esi0070_0005	-6071.73	-6075.8	8.13198	0.00434913	Major facilitator superfamily (715) ;mRNA; f:4546238-4563380
Esi0264_0018	-1489.71	-1491.65	3.89112	0.0485422	Deoxycytidylate deaminase-related (285) ;mRNA; f:2813353-2819349
Esi0170_0046	-8281.21	-8287.71	13.0142	0.000309133	Peptidase C48, SUMO/Sentrin/Ubl1 (1322) ;mRNA; r:823875-835974
Esi0008_0238	-2659.04	-2661.19	4.308	0.0379336	similar to TAK1 (TGF-beta-activated kinase) (401) ;mRNA; f:9075591-9082387
Esi0254_0007	-3268.72	-3271.56	5.67757	0.0171832	conserved unknown protein (334) ;mRNA; f:7889100-7897719
Esi0177_0014	-2908.09	-2911.74	7.29126	0.00692909	Metallo-dependent phosphatase-like (464) ;mRNA; r:3526138-3529074
Esi0090_0052	-2338.62	-2342.75	8.25011	0.00407495	conserved unknown protein (338) ;mRNA; f:3647904-3651451
Esi0058_0024	-2569.19	-2573.8	9.21598	0.00239911	endonuclease III/similar to 8-oxoguanine DNA glycosylase isoform 1b (455)
Esi0333_0017	-3896.8	-3894.74	-4.11736	0.0424453	Alpha-1,3-mannosyl-glycoprotein 2-beta-N-acetylglucosaminyltransferase, family GT13 (650) ;mRNA; f:1432058-1447174
Esi0113_0004	-3111.22	-3113.58	4.72111	0.0297945	expressed unknown protein (305) ;mRNA; f:158576-161031
Esi0018_0112	-3496.6	-3505	16.7977	4.1584e-05	conserved unknown protein (304) ;mRNA; f:4287365-4290195
Esi0035_0139	-3572.4	-3575.91	7.01958	0.00806231	acyltransferase (426) ;mRNA; f:3159902-3171245
Esi0098_0056	-3534.84	-3538.28	6.87536	0.00873921	Sulfotransferase domain (437) ;mRNA; f:827780-835276
Esi0017_0035	-3134.4	-3136.52	4.22981	0.0397198	HAD-superfamily hydrolase, subfamily IIA (373) ;mRNA; f:437673-442832
Esi0038_0034	-2490.51	-2493.74	6.4657	0.0109976	expressed unknown protein (265) ;mRNA; r:1847577-1851474
Esi0037_0054	-4878.23	-4880.24	4.0264	0.0447935	Sulfotransferase (512) ;mRNA; r:5277894-5288125
Esi0120_0041	-9884.35	-9889.65	10.6039	0.00112849	Tetratricopeptide-like helical domain (1119) ;mRNA; r:257729-273383
Esi0300_0018	-1710.96	-1715.02	8.10311	0.00441894	Light harvesting complex protein (212) ;mRNA; f:4377571-4382718
Esi0300_0013	-8502.58	-8506.95	8.7312	0.0031281	Strawberry notch, helicase C domain (1253) ;mRNA; r:4331304-4356969
Esi0147_0013	-1745.42	-1750.16	9.4854	0.00207114	START-like domain (1060) ;mRNA; r:2663056-2679240
Esi0131_0061	-3243.43	-3246.67	6.4873	0.0108648	JmjC domain (561) ;mRNA; r:5468051-5478643
Esi0132_0050	-5313.97	-5316.06	4.18202	0.040855	Acyl transferase/acyl hydrolase/lysophospholipase (583) ;mRNA; f:2592008-2599405
Esi0005_0014	-2433.32	-2437.59	8.54343	0.00346772	SR RNA splicing protein (634) ;mRNA; f:6624287-6637837
Esi0085_0083	-5566.6	-5570.88	8.56354	0.00342962	Sjoegren syndrome/scleroderma autoantigen 1 (566) ;mRNA; r:222991-225824
Esi0189_0045	-986.574	-989.863	6.57776	0.0103261	Mago nashi (148) ;mRNA; f:4474144-4475643
Esi0054_0002	-3960.53	-3963.01	4.96137	0.0259196	MFS family transporter: sugar (489) ;mRNA; r:1109344-1120653
Esi0257_0009	-3156.6	-3162.02	10.8558	0.000984867	Peroxin-3 domain (711) ;mRNA; r:1744641-1755798
Esi0041_0153	-3427.96	-3434.26	12.6014	0.000385448	EIF2S3, gamma subunit of the eukaryotic translation initiation factor
Esi0215_0020	-3370.49	-3372.74	4.50957	0.0337058	filamentous temperature sensitive Z (671) ;mRNA; r:112155-123666
Esi0072_0064	-3808.71	-3815.48	13.5401	0.000233522	SDH1, succinate dehydrogenase subunit 1 (541) ;mRNA; r:4425057-4439989
Esi1160_0001	-3192.8	-3195.92	6.24268	0.0124708	F-box domain (322) ;mRNA; r:914937-915975
Esi0198_0012	-2952.54	-2954.84	4.5972	0.0320241	conserved unknown protein (220) ;mRNA; r:2586014-2586940
Esi0186_0038	-6101.18	-6103.25	4.14353	0.0417939	conserved unknown protein (974) ;mRNA; r:8620634-8635660
Esi0342_0005	-2125.28	-2127.45	4.33631	0.0373077	conserved unknown protein (249) ;mRNA; r:3440797-3443812
Esi0719_0005	-8938.48	-8940.76	4.55966	0.0327336	Rhodanese-like domain (1441) ;mRNA; f:16098264-16108384
Esi0002_0279	-2129.49	-2132.77	6.56116	0.0104228	G-patch domain (245) ;mRNA; r:5716957-5717970
Esi0031_0031	-3968.04	-3969.99	3.89747	0.0483589	LNS2, Lipin/Ned1/Smp2 (488) ;mRNA; r:5485302-5491061
Esi0018_0073	-2275.57	-2278.43	5.7267	0.0167089	selenide, water dikinase also called selenophosphate synthase (890) ;mRNA;
Esi0215_0039	-4707.98	-4711.81	7.66429	0.00563245	Zinc finger, C3HC4 RING-type (898) ;mRNA; f:238605-245615
Esi0368_0024	-3648.05	-3650.85	5.58899	0.0180737	conserved unknown protein (989) ;mRNA; f:1374868-1395999
Esi0301_0015	-3927.03	-3929.21	4.36407	0.0367045	conserved unknown protein (1099) ;mRNA; r:1272461-1291261
Esi0026_0126	-1299.82	-1302.15	4.65476	0.0309676	Cyclophilin-like domain (188) ;mRNA; f:2871553-2874014
Esi0018_0008	-2049.17	-2056.04	13.7484	0.000208997	Similar to photosystem II oxygen evolving complex protein PsbP
Esi0012_0092	-5884.9	-5882.78	-4.23772	0.0395351	Ci-SWI/SNF (1051) ;mRNA; r:723783-750426
Esi0063_0032	-10717.7	-10719.9	4.34606	0.0370946	Magnesium chelatase subunit H, putative chloroplast precursor (1443) ;mRNA;
Esi0020_0094	-15953.9	-15956	4.26326	0.038945	conserved unknown protein (2199) ;mRNA; f:693754-724035
Esi0059_0122	-4015.22	-4018.13	5.8039	0.0159907	cationic amino acid transporter-like protein (689) ;mRNA; f:5702017-5712760
Esi0144_0063	-3586.03	-3588.38	4.71374	0.0299225	HhH-GPD domain (420) ;mRNA; f:1799200-1803276
Esi0049_0070	-2987.21	-2991.37	8.31388	0.00393433	BTB/POZ-like (356) ;mRNA; f:5039300-5047207
Esi0334_0012	-763.957	-767.714	7.51386	0.00612259	Adenylate kinase/UMP-CMP kinase (993) ;mRNA; r:5219590-5225318
Esi0004_0227	-3278.82	-3282.05	6.44953	0.0110982	Pseudouridine synthase, RsuA/RluB/C/D/E/F (509) ;mRNA; r:4568711-4573301
Esi0319_0018	-2253.7	-2260.96	14.5265	0.000138199	Pumilio RNA-binding repeat (544) ;mRNA; r:1410465-1417959
Esi0004_0259	-11583.1	-11586.4	6.77682	0.00923493	Domain of unknown function DUF547 (1742) ;mRNA; f:4748791-4773073
Esi0073_0048	-2664.53	-2667.68	6.28979	0.0121436	DNA polymerase family X lyase domain (281) ;mRNA; f:1213650-1221002
Esi0013_0043	-21720	-21723.6	7.0629	0.00786967	expressed unknown protein (3547) ;mRNA; f:1395292-1430771
Esi0036_0143	-2746.01	-2749.19	6.34262	0.0117871	UbiB domain (724) ;mRNA; r:2191705-2201900
Esi0071_0036	-10402.3	-10404.6	4.59004	0.0321582	conserved unknown protein (2215) ;mRNA; f:4857719-4871985
Esi0026_0013	-4119.26	-4121.37	4.21898	0.0399741	chromatin remodeling complex subunit (2009) ;mRNA; r:2154628-2183141
Esi0503_0004	-7413.84	-7417.09	6.50204	0.0107751	DNA primase (1266) ;mRNA; r:1645252-1656522
Esi0007_0129	-1446.74	-1448.68	3.89798	0.0483441	conserved unknown protein (254) ;mRNA; r:2088397-2093041
Esi0069_0095	-5840.96	-5842.99	4.04961	0.0441816	CCT domain (716) ;mRNA; r:615782-624249
Esi0081_0107	-6740.12	-6742.04	3.84808	0.0498029	Domain of unknown function DUF4332 (891) ;mRNA; r:5484456-5489421
Esi0101_0066	-5872.97	-5875.76	5.56555	0.0183172	Flavoprotein-like (717) ;mRNA; f:1142294-1151790
Esi0021_0146	-3781.99	-3784.66	5.34256	0.0208109	putative; katanin like protein (453) ;mRNA; f:3531322-3540363
Esi0034_0131	-2072.45	-2078.35	11.7845	0.000597245	Snf7 family (261) ;mRNA; f:3517460-3522133
Esi0214_0003	-10445.9	-10454.1	16.2833	5.4543e-05	Multifunctional pyrimidine synthesis protein (1303) ;mRNA; f:738525-759986
Esi0085_0102	-5993.02	-5995.14	4.22848	0.0397511	Endonuclease/exonuclease/phosphatase (754) ;mRNA; f:133406-136075
Esi0018_0211	-3427.95	-3430.18	4.46371	0.0346222	MutS protein homolog 1A (619) ;mRNA; f:3821469-3828634
Esi0021_0061	-2067.93	-2069.99	4.11197	0.0425808	S-adenosyl-L-methionine-dependent methyltransferase (247) ;mRNA; r:3970327-3975457
Esi0000_0240	-10130.3	-10133.6	6.68119	0.00974357	SNF2-related (1530) ;mRNA; f:4754364-4761477
Esi0418_0021	-5753.9	-5756.13	4.46886	0.0345181	Peptidase M16, C-terminal domain (856) ;mRNA; r:1334180-1352461
Esi0453_0002	-3682.64	-3685.49	5.6913	0.0170492	Proton-dependent oligopeptide transporter family (497) ;mRNA; f:5461107-5469816
Esi0082_0090	-3564.87	-3568.87	8.01191	0.00464708	Domain of unknown function DUF1767 (735) ;mRNA; r:6212808-6217982
Esi0092_0081	-5430.35	-5432.62	4.54584	0.0329989	P-loop containing nucleoside triphosphate hydrolase (1811) ;mRNA; f:4870623-4892084
Esi0002_0097	-4035.7	-4038.75	6.11314	0.013418	Alkaline-phosphatase-like, core domain (512) ;mRNA; f:6745498-6751493
Esi0203_0037	-3706.37	-3710.96	9.18677	0.0024377	[Skp1-protein]-hydroxyproline N-acetylglucosaminyltransferase, family GT60 (441) ;mRNA; r:7638674-7646420
Esi0045_0050	-2506.55	-2509.96	6.81429	0.00904311	Senescence marker protein-30 (SMP-30) (378) ;mRNA; f:1149610-1157975
Esi0047_0101	-7471.71	-7475.54	7.67097	0.00561163	P-type ATPase, cytoplasmic domain N (910) ;mRNA; f:2052976-2072462
Esi0028_0022	-11213.2	-11208.5	-9.33911	0.00224314	WD40-repeat-containing domain (1746) ;mRNA; r:5090186-5100602
Esi0021_0023	-2683.74	-2686.89	6.29853	0.0120838	conserved unknown protein (558) ;mRNA; f:4213372-4220113
Esi0000_0080	-3920.7	-3922.7	4.00021	0.0454945	P-loop containing nucleoside triphosphate hydrolase (554) ;mRNA; r:5642900-5646526
Esi0292_0033	-3675.69	-3678.01	4.64059	0.0312243	putative phosphate/phosphoenolpyruvate translocator precursor protein (415) ;mRNA; f:8213043-8216089
Esi0087_0054	-14945.1	-14958.8	27.3538	1.69e-07	SAC3/GANP/Nin1/mts3/eIF-3 p25 (2544) ;mRNA; r:1293851-1309085
Esi0489_0018	-1857.24	-1861.22	7.95242	0.00480231	SWIB/MDM2 domain (325) ;mRNA; r:5473110-5481154
Esi0320_0016	-15475.4	-15478.3	5.89534	0.015181	tRNA (guanine-N1-)-methyltransferase, N-terminal (1771) ;mRNA; f:4241232-4264949
Esi0203_0053	-9981.62	-9983.67	4.0853	0.0432579	hypothetical protein (1062) ;mRNA; r:7726392-7740909
Esi0062_0072	-2019.93	-2023.62	7.38886	0.00656291	transducin family protein (730) ;mRNA; f:3702829-3711751
Esi0211_0016	-2705.63	-2712.69	14.1279	0.000170792	Acyl-CoA N-acyltransferase (341) ;mRNA; r:4910940-4919049
Esi0110_0046	-2838.05	-2834.13	-7.83069	0.00513665	60S ribosomal protein L3 (409) ;mRNA; f:6235903-6241629
Esi0312_0035	-1687.81	-1691.15	6.66644	0.00982451	geranylgeranyl pyrophosphate synthase, chloroplast precursor (255) ;mRNA; f:4474840-4477661
Esi0034_0065	-5380.04	-5382.57	5.06977	0.0243466	Diphthamide biosynthesis protein 2, putative (898) ;mRNA; r:3869006-3876167
Esi0392_0021	-18750.6	-18754.2	7.28941	0.00693622	Proteasome component ECM29/Translational activator GCN1 (2284) ;mRNA; r:4950726-4965711
Esi0226_0001	-4324.68	-4330.52	11.6931	0.000627336	Choline transporter-like (496) ;mRNA; r:6362831-6377671
Esi0086_0049	-4305.52	-4302.39	-6.26219	0.0123342	START-like domain (620) ;mRNA; r:7376838-7382511
Esi0116_0026	-2357.3	-2359.96	5.33083	0.0209514	Association with the SNF1 complex (ASC) domain (283) ;mRNA;
Esi0073_0036	-2758.99	-2764.38	10.7669	0.00103331	2-oxoglutarate dehydrogenase, E2 component (337) ;mRNA; r:1150133-1159540
Esi0163_0054	-2271.4	-2275.59	8.37951	0.00379475	HECT (752) ;mRNA; r:8898924-8913210
Esi0011_0154	-5410.33	-5412.61	4.5663	0.0326068	SHQ1 protein (1269) ;mRNA; r:2441351-2456241
Esi0000_0603	-7478.36	-7481.41	6.08815	0.0136091	Vesicle coat complex COPII, subunit SEC31 (1067) ;mRNA; f:2613604-2629400
Esi0111_0026	-4403.09	-4400.06	-6.0466	0.0139331	conserved unknown protein (477) ;mRNA; f:6637106-6643425
Esi0100_0051	-2478.88	-2482.01	6.26069	0.0123446	Alpha/Beta hydrolase fold (249) ;mRNA; f:5047983-5051113
Esi0355_0021	-2413.61	-2417.24	7.26149	0.00704488	immunophilin (316) ;mRNA; r:6455864-6463515
Esi0025_0153	-1508.77	-1510.79	4.04191	0.0443835	HSP20-like chaperone (183) ;mRNA; r:2545448-2552274
Esi0002_0016	-4170.32	-4179.13	17.6222	2.6943e-05	GNAT domain (401) ;mRNA; r:7159102-7163673
Esi0002_0327	-4954.41	-4958.57	8.32489	0.00391055	transketolase (730) ;mRNA; f:5462097-5469275
Esi0000_0293	-27983.3	-27994.6	22.7529	1.842e-06	Vacuolar protein sorting-associated protein 13 (3010) ;mRNA; f:4401377-4434530
Esi0115_0089	-3969.46	-3959.41	-20.0989	7.354e-06	Armadillo-type fold (482) ;mRNA; r:5992032-6000840
Esi0033_0117	-10900.5	-10895.4	-10.0644	0.00151165	Rab3 GTPase-activating protein catalytic subunit (1973) ;mRNA; f:2110388-2128430
Esi0032_0106	-5656.92	-5659.32	4.79193	0.0285934	conserved unknown protein (824) ;mRNA; f:4386010-4397108
Esi0065_0112	-6279.14	-6281.98	5.67055	0.0172521	Hypothetical leucine rich repeat calcium binding protein (1870) ;mRNA;
Esi0002_0265	-3885.44	-3895.7	20.5185	5.906e-06	Zinc finger, RING/FYVE/PHD-type (441) ;mRNA; f:5777837-5789121
Esi0041_0008	-2099.05	-2101.7	5.29752	0.0213559	conserved unknown protein (261) ;mRNA; r:3644808-3650403
Esi0090_0023	-3877.5	-3875.02	-4.97379	0.0257342	ER degradation-enhancing alpha-mannosidase-like 1, family GH47 (860) ;mRNA; r:3780420-3789527
Esi0183_0067	-1494.02	-1496.25	4.45003	0.0349007	Ankyrin repeat-containing domain (297) ;mRNA; r:5090612-5096890
Esi0486_0003	-1710.44	-1712.92	4.96035	0.025935	Chlorophyll a/b binding protein domain (240) ;mRNA; f:304663-309673
Esi0479_0013	-4188.8	-4190.92	4.22735	0.0397774	Autophagy-related protein 4 (532) ;mRNA; r:1640938-1645922
Esi0127_0050	-3171.31	-3174.46	6.29343	0.0121186	SWAP/Surp (901) ;mRNA; f:290587-299373
Esi0119_0019	-3939.59	-3941.79	4.39608	0.0360216	Protein kinase-like domain (396) ;mRNA; r:1242127-1247536
Esi0131_0014	-4499.82	-4502.71	5.79093	0.016109	conserved unknown protein (438) ;mRNA; r:5725683-5728252
Esi0048_0106	-1961.11	-1963.04	3.85723	0.0495321	ATPase, V1 complex, subunit C (439) ;mRNA; f:3255381-3262953
Esi0308_0036	-2520.47	-2522.84	4.74419	0.0293973	Threonine aldolase (472) ;mRNA; f:2587222-2592123
Esi0028_0043	-3727.61	-3734.06	12.9024	0.000328166	G-protein coupled receptor (439) ;mRNA; f:5235307-5241091
Esi0283_0033	-3689.16	-3691.95	5.57346	0.0182347	Peptidase M18 (455) ;mRNA; f:2806044-2815233
Esi0023_0149	-7426.7	-7416.9	-19.6115	9.489e-06	Snu114, GTPase of the U5 snRNP particle (985) ;mRNA;
Esi0090_0064	-3009.8	-3013.99	8.3795	0.00379477	ABC transporter-like (697) ;mRNA; r:3578107-3588062
Esi0060_0115	-2703.83	-2707.08	6.50036	0.0107852	putative peptidase (394) ;mRNA; r:2721889-2728906
Esi0021_0107	-8275.93	-8281.49	11.1227	0.00085279	Clathrin/coatomer adaptor, adaptin-like, N-terminal (1142) ;mRNA; f:3731198-3738106
Esi0121_0014	-2237.05	-2240.73	7.35758	0.00667805	FYVE zinc finger (233) ;mRNA; f:1439331-1442876
Esi0026_0145	-4498.41	-4502.46	8.11103	0.00439967	Zinc finger, RanBP2-type (1085) ;mRNA; f:2951217-2966444
Esi0019_0071	-1684.56	-1688.5	7.86395	0.00504301	Glyoxalase/Bleomycin resistance protein/Dihydroxybiphenyl dioxygenase (180) ;mRNA; f:932609-935113
Esi0244_0043	-2420.47	-2422.77	4.61139	0.0317602	spermidine/spermine synthase (285) ;mRNA; f:2900134-2903510
Esi0193_0026	-2084.77	-2087.43	5.30962	0.0212079	Histidinol-phosphate transaminase (401) ;mRNA; f:812698-816055
Esi0094_0009	-15327.2	-15333.3	12.1889	0.000480749	C2 domain (8826) ;mRNA; f:2695025-2768212
Esi0030_0140	-3749.04	-3753.6	9.10775	0.00254529	Inositol polyphosphate kinase (479) ;mRNA; r:3473742-3480696
Esi0100_0065	-3576.95	-3580.27	6.63537	0.00999734	conserved unknown protein (481) ;mRNA; f:4973321-4983336
Esi0016_0010	-4231.57	-4235.47	7.78823	0.00525878	conserved unknown protein (512) ;mRNA; r:1355751-1363736
Esi0082_0088	-1985.75	-1988.18	4.85236	0.0276083	PDZ domain (219) ;mRNA; r:6202801-6206616
Esi0070_0016	-7540.16	-7547.75	15.1773	9.7873e-05	hemolysin-type calcium-binding region (831) ;mRNA; f:4500193-4504695
Esi0038_0041	-3469.18	-3475.37	12.3701	0.000436272	conserved unknown protein (453) ;mRNA; r:1890438-1897230
Esi0055_0019	-5909.7	-5911.63	3.85919	0.0494743	Phospholipid/glycerol acyltransferase (652) ;mRNA; r:1755233-1763996
Esi0059_0033	-6435.03	-6437.46	4.86752	0.0273668	CBS domain (667) ;mRNA; r:6189763-6203985
Esi0014_0053	-1558.18	-1562	7.65599	0.00565841	EGF-like domain, extracellular (756) ;mRNA; f:6472619-6478489
Esi0159_0053	-7083	-7085.11	4.22524	0.039827	Heat shock protein 70 (985) ;mRNA; f:6976695-6986793
Esi0006_0196	-6575.37	-6577.61	4.48268	0.03424	Armadillo-like helical (737) ;mRNA; f:6275067-6278490
Esi0018_0093	-6310.05	-6319.57	19.0458	1.2762e-05	VRR-NUC domain (1819) ;mRNA; r:4398808-4408012
Esi0141_0009	-4812.12	-4814.85	5.46694	0.0193795	divalent metal transporter (629) ;mRNA; f:1034107-1040885
Esi0140_0002	-3680.15	-3682.4	4.49056	0.0340825	imm downregulated 26 (505) ;mRNA; r:6042234-6046818
Esi0102_0055	-10170.6	-10173.1	4.96706	0.0258345	Nrap protein (1264) ;mRNA; f:1023787-1038425
Esi0117_0017	-7965.46	-7968.03	5.1383	0.0234036	Early transcription elongation factor of RNA pol II, NGN
Esi0199_0012	-1952.72	-1954.82	4.20755	0.0402444	Phosphoserine phosphatase (307) ;mRNA; r:1535836-1541203
Esi0088_0093	-2385.99	-2388.8	5.6038	0.0179216	conserved unknown protein (1785) ;mRNA; r:4425009-4446513
Esi0091_0062	-2367.07	-2364.9	-4.34651	0.0370848	FKBP-type peptidyl-prolyl cis-trans isomerase (326) ;mRNA; f:2906686-2911209
Esi0005_0083	-3016.29	-3011	-10.5879	0.00113827	acyl-CoA dehydrogenase (413) ;mRNA; f:6205624-6216159
Esi0002_0209	-1826.68	-1829.94	6.51791	0.0106793	Prolyl 4-hydroxylase, alpha subunit (347) ;mRNA; r:6098898-6101283
Esi0014_0012	-11155.1	-11163.7	17.02	3.6989e-05	DEAD box helicase (1229) ;mRNA; f:6247580-6253490
Esi0054_0003	-3817.28	-3820.12	5.69089	0.0170532	conserved unknown protein (427) ;mRNA; f:1102446-1106644
Esi0069_0089	-28865.6	-28872.4	13.4967	0.000238981	Chromo domain-like (3475) ;mRNA; f:555122-586751
Esi0261_0016	-4622.55	-4620.39	-4.32956	0.0374558	Lipase maturation factor (533) ;mRNA; r:3010597-3018113
Esi0041_0023	-2467.12	-2469.51	4.78674	0.0286797	EF-hand domain pair (298) ;mRNA; r:3702346-3712883
Esi0212_0052	-4753	-4759.53	13.0679	0.000300405	Radical SAM (605) ;mRNA; f:2891956-2908401
Esi0008_0249	-2137.78	-2140.02	4.46814	0.0345326	UDP-galactose transporter (246) ;mRNA; f:9034540-9036544
Esi0031_0054	-3329.77	-3332.89	6.23318	0.0125379	CWC16 protein (447) ;mRNA; f:5630342-5635264
Esi0012_0182	-3500.19	-3502.47	4.56553	0.0326215	conserved unknown protein (411) ;mRNA; f:128980-137441
Esi0241_0027	-2503.11	-2506.59	6.96768	0.0082995	conserved unknown protein (1213) ;mRNA; f:6144152-6158287
Esi0117_0044	-6576.72	-6578.82	4.19801	0.0404715	Bifunctional glycosyltransferase, family GT74 / family GT2 (897) ;mRNA;
Esi0148_0040	-7605.11	-7607.87	5.521	0.0187895	Zinc finger, RING/FYVE/PHD-type (1011) ;mRNA; r:5783139-5793066
Esi0074_0054	-3211.54	-3213.95	4.80332	0.028405	acyl-CoA binding domain protein and partial Diacylglycerol O-acyltransferase (933)
Esi0145_0068	-6389.66	-6394.28	9.23781	0.00237068	Ca2+-ATPase (1103) ;mRNA; r:3726519-3744659
Esi0010_0009	-5406.75	-5409.3	5.09839	0.0239481	conserved unknown protein (1404) ;mRNA; f:3663672-3679191
Esi0141_0065	-3142.3	-3144.94	5.29107	0.021435	MIF4G-like, type 3 (897) ;mRNA; r:1321794-1329231
Esi0398_0019	-1379.22	-1381.36	4.27004	0.0387901	hypothetical protein (137) ;mRNA; f:462620-465726
Esi0131_0047	-2437.21	-2445.85	17.2651	3.251e-05	Nurf-55 (254) ;mRNA; r:5538017-5541699
Esi0058_0008	-4628.58	-4630.6	4.0341	0.0445895	SAC3/GANP/Nin1/mts3/eIF-3 p25 (788) ;mRNA; f:723454-728616
Esi0205_0050	-7461.29	-7466.06	9.53467	0.00201627	mRNA decapping complex protein (1864) ;mRNA; f:1170876-1193834
Esi0165_0057	-3988.54	-3992.74	8.40545	0.00374098	eukaryotic translation initiation factor 2B gamma subunit (420) ;mRNA;
Esi0302_0022	-12085.6	-12088.1	4.89425	0.0269462	Clathrin heavy chain (1736) ;mRNA; f:669011-692107
Esi0394_0013	-10500.8	-10507.3	13.0986	0.000295519	Tetratricopeptide-like helical domain (1819) ;mRNA; r:3702571-3724821
Esi0113_0001	-3233.84	-3236.03	4.38034	0.0363558	conserved unknown protein (325) ;mRNA; f:139386-151039
Esi0388_0021	-3949.63	-3951.7	4.15587	0.0414904	Nucleic acid-binding, OB-fold (989) ;mRNA; f:2711473-2724758
Esi0322_0004	-2896.06	-2898.62	5.12773	0.0235465	Leucine carboxyl methyltransferase (328) ;mRNA; r:14021-28272
Esi0099_0079	-3736.35	-3740.12	7.5527	0.00599204	DEAD box helicase (611) ;mRNA; f:4127880-4139449
Esi0121_0024	-11064	-11066.5	5.08488	0.0241353	Peptidase C48, SUMO/Sentrin/Ubl1 (1612) ;mRNA; r:1490132-1510153
Esi0378_0002	-2412.84	-2420.7	15.7181	7.3519e-05	Glyceraldehyde 3-phosphate dehydrogenase, catalytic domain (325) ;mRNA; f:4105638-4116640
Esi0256_0041	-4038.7	-4041.05	4.71008	0.0299863	K Homology domain, type 1 (1782) ;mRNA; r:991003-1007653
Esi0003_0188	-2226.82	-2229.67	5.71469	0.0168236	Major facilitator superfamily domain (345) ;mRNA; r:2639398-2643856
Esi0009_0147	-3539.93	-3548.74	17.6198	2.6977e-05	tRNA-specific 2-thiouridylase (492) ;mRNA; f:2712251-2717662
Esi0103_0003	-1066.32	-1071.28	9.91457	0.00163976	expressed unknown protein (132) ;mRNA; r:4781579-4785066
Esi0003_0263	-2392.04	-2395.98	7.87034	0.00502523	Brix domain (289) ;mRNA; r:2942751-2956142
Esi0187_0038	-10923.7	-10927.3	7.31129	0.00685226	Armadillo-like helical (1923) ;mRNA; r:507510-531837
Esi0320_0024	-7254.01	-7255.97	3.9168	0.0478057	Peptidase S59, nucleoporin (2054) ;mRNA; r:4289464-4302970
Esi0122_0036	-2656.95	-2661.22	8.5417	0.00347102	C2 domain (388) ;mRNA; f:167408-172239
Esi0033_0002	-2317.77	-2320.38	5.23106	0.022187	C2H2 zinc finger protein (331) ;mRNA; r:1435829-1440291
Esi0431_0007	-4846.14	-4853.09	13.9014	0.00019265	CAAX amino terminal protease (587) ;mRNA; f:1077782-1085000
Esi0037_0049	-2433.74	-2436	4.52582	0.0333871	conserved unknown protein (249) ;mRNA; f:5309273-5314054
Esi0504_0004	-7192.37	-7197.15	9.56345	0.0019849	Chromatin assembly factor 1 subunit A (1649) ;mRNA; r:3867303-3882677
Esi0021_0044	-1785.02	-1786.94	3.84281	0.0499597	expressed unknown protein (285) ;mRNA; f:4064320-4069615
Esi0000_0204	-8997.61	-9000.9	6.5736	0.0103502	WD40 repeat (1127) ;mRNA; f:4917503-4931013
Esi0213_0038	-2747.74	-2749.72	3.95642	0.0466928	conserved unknown protein (377) ;mRNA; r:3698883-3708380
Esi0151_0017	-1449.79	-1452	4.41988	0.0355225	AAA+ ATPase domain (1202) ;mRNA; f:1021842-1036878
Esi0000_0089	-3335.56	-3333.27	-4.58405	0.0322708	DRG2, developmentally regulated GTPase 2 (405) ;mRNA; r:5595758-5602756
Esi0081_0075	-2514.34	-2516.44	4.18421	0.0408021	SUN domain (265) ;mRNA; f:5323491-5325592
Esi0087_0028	-2504.07	-2507	5.87249	0.0153793	Integral membrane protein TerC, riboswitch-linked (422) ;mRNA; r:1444018-1447582
Esi0378_0007	-7457.18	-7453.74	-6.87784	0.00872709	Eukaryotic translation initiation factor 3 subunit a (subunit 10)
Esi0099_0100	-5250.66	-5256.6	11.8689	0.0005708	conserved unknown protein (847) ;mRNA; f:4254629-4260421
Esi0355_0016	-718.512	-720.532	4.03967	0.0444425	Ribosomal protein S17 (225) ;mRNA; f:6427320-6429953
Esi0226_0038	-2877.17	-2874.89	-4.54756	0.0329657	S-adenosylmethionine-dependent methyltransferase (505) ;mRNA; r:6188201-6193105
Esi0058_0057	-2037.05	-2039.42	4.73944	0.0294787	Protein of unknown function DUF4602 (254) ;mRNA; r:503305-506861
Esi0172_0063	-2566.24	-2563.62	-5.22763	0.0222308	CBS domain (346) ;mRNA; f:3303184-3312577
Esi0058_0050	-1825.23	-1827.28	4.10983	0.0426346	conserved unknown protein (256) ;mRNA; r:549798-552478
Esi0233_0017	-9131.86	-9136.05	8.3809	0.00379184	DNA polymerase, Y-family, little finger domain (1560) ;mRNA; f:788165-804219
Esi0367_0023	-8758.1	-8765.25	14.2909	0.00015662	Acetyl-CoA carboxylase, partial (1049) ;mRNA; r:3490370-3507598
Esi0003_0234	-20682.4	-20690.7	16.4483	4.9994e-05	dynein heavy chain (4240) ;mRNA; r:2823349-2852984
Esi0264_0007	-5804.72	-5807.13	4.82874	0.027989	Translation initiation factor SUI1 (658) ;mRNA; r:2761796-2770513
Esi0279_0024	-3803.64	-3805.92	4.54456	0.0330235	Nucleic acid-binding, OB-fold (670) ;mRNA; r:743736-755807
Esi0089_0116	-3514.69	-3520.8	12.2318	0.000469815	hypothetical protein (682) ;mRNA; r:3116581-3127172
Esi0034_0057	-3164.25	-3167.08	5.6629	0.0173275	Rad1/Rec1/Rad17 (409) ;mRNA; r:3931425-3945296
Esi0085_0033	-1981.66	-1983.97	4.62414	0.031525	Lsg1, cytoplasmic GTPase involved in the ribosome assembly (722)
Esi0052_0013	-1896.77	-1904.02	14.5154	0.00013902	expressed unknown protein (352) ;mRNA; f:4804797-4808978
Esi0000_0597	-6145.83	-6147.98	4.30645	0.0379681	Zinc finger, RING/FYVE/PHD-type (1309) ;mRNA; r:2676925-2693000
Esi0119_0028	-3259.81	-3255.49	-8.6438	0.00328177	eukaryotic peptide chain release factor 1 (442) ;mRNA; r:1290546-1299017
Esi0036_0155	-8968.32	-8974.03	11.4286	0.000723236	Helicase, C-terminal (991) ;mRNA; r:2259035-2278056
Esi0047_0054	-3272.03	-3275.9	7.74294	0.00539229	3-isopropylmalate dehydrogenase (428) ;mRNA; f:2320591-2327694
Esi0526_0006	-4151.34	-4153.84	4.99656	0.0253977	Ammonium transporter (492) ;mRNA; f:11018266-11030755
Esi0078_0052	-3789.75	-3794.45	9.39545	0.00217525	Rad9/Ddc1 (583) ;mRNA; r:3899913-3908541
Esi0274_0036	-2484.59	-2487.53	5.88435	0.015276	conserved unknown protein (372) ;mRNA; f:2462859-2467982
Esi0008_0037	-2307.73	-2310.05	4.64451	0.0311531	conserved unknown protein (499) ;mRNA; f:10071877-10077116
Esi0120_0077	-1636.2	-1639.43	6.46489	0.0110027	Trimeric LpxA-like (186) ;mRNA; r:474683-477488
Esi0000_0238	-2241.76	-2246.08	8.63884	0.00329071	conserved unknown protein (311) ;mRNA; f:4764867-4777436
Esi0005_0142	-3103.88	-3106.18	4.60451	0.031888	conserved unknown protein (403) ;mRNA; r:5892314-5899185
Esi0331_0011	-4373.33	-4375.4	4.13956	0.0418921	Domain of unknown function DUF21 (773) ;mRNA; r:2014097-2025715
Esi0036_0080	-2456.44	-2460.82	8.75721	0.0030838	Heat Shock transcription factor (578) ;mRNA; f:1818913-1823652
Esi0063_0058	-3077.5	-3079.95	4.91365	0.0266452	Histidyl-tRNA Synthetase Similar to Histidine Ammonia-Lyase (956) ;mRNA; r:6122979-6135248
Esi0503_0006	-4210.42	-4216.61	12.3827	0.000433338	Sorting and Assembly Machinery 50kDa protein (N-terminal) (372) ;mRNA;
Esi0203_0035	-3298.03	-3302.57	9.0701	0.00259822	Heat shock protein 40 (431) ;mRNA; f:7626490-7632020
Esi0175_0019	-3955.58	-3961.82	12.4788	0.000411586	Heat shock protein 40 (683) ;mRNA; r:6021278-6028674
Esi0051_0024	-13409.6	-13414	8.90487	0.0028441	MORN motif (1662) ;mRNA; f:4806475-4832965
Esi0482_0020	-1400.55	-1402.56	4.01099	0.0452047	Vesicle coat complex COPI, beta sub-unit (190) ;mRNA; f:9805917-9814301
Esi0042_0115	-2142.72	-2147.27	9.11466	0.00253569	Protein of unknown function UPF0301 (338) ;mRNA; r:1709816-1718184
Esi0108_0072	-1435.97	-1438.07	4.20058	0.0404103	S-adenosyl-L-methionine-dependent methyltransferase (398) ;mRNA; f:2558105-2560780
Esi0097_0006	-3868.98	-3873.07	8.18175	0.0042314	conserved unknown protein (469) ;mRNA; r:4802660-4817061
Esi0022_0171	-21739.9	-21745.9	11.9201	0.00055532	Rab-GTPase-TBC domain (2403) ;mRNA; r:3246943-3262594
Esi0053_0045	-5520.7	-5524.53	7.66408	0.00563309	Dihydroxyacetone/glycerone kinase (612) ;mRNA; r:2041290-2050928
Esi0102_0008	-3187	-3191.35	8.70883	0.00316673	Las1-like (758) ;mRNA; r:692383-702253
Esi0331_0031	-1054.09	-1056.93	5.66526	0.0173041	conserved unknown protein (135) ;mRNA; f:1898620-1902988
Esi0116_0046	-5572.63	-5575.23	5.20248	0.0225546	hypothetical protein (3110) ;mRNA; r:2157913-2173608
Esi0115_0043	-2485.93	-2489.45	7.04307	0.00795724	CHloroplast inner membrane protein TIC 21 (327) ;mRNA; r:5741666-5746194
Esi0211_0010	-4104.95	-4106.9	3.90917	0.0480232	Ubiquitin-associated/translation elongation factor EF1B, N-terminal, eukaryote (565) ;mRNA; f:4936424-4946170
Esi0043_0119	-7108.21	-7110.32	4.22225	0.0398971	Tetratricopeptide-like helical domain (1136) ;mRNA; f:5708181-5719643
Esi0060_0015	-8778.73	-8784.29	11.1217	0.000853241	Type I phosphodiesterase/nucleotide pyrophosphatase/phosphate transferase (1398) ;mRNA; f:2120690-2131945
Esi0035_0038	-2295.66	-2297.71	4.09392	0.0430378	expressed unknown protein (231) ;mRNA; r:2607722-2611518
Esi0226_0040	-5329.74	-5331.96	4.44525	0.0349985	Peptidase and C2H2 zinc finger protein (1642) ;mRNA; f:6174600-6186512
Esi0268_0023	-4024.95	-4027.21	4.51884	0.0335236	protoporphyrinogen oxidase, putative chloroplast precursor (552) ;mRNA; f:3476557-3490381
Esi0252_0029	-2401.99	-2407.25	10.525	0.00117772	Carbohydrate kinase, FGGY, N-terminal (784) ;mRNA; r:6491579-6505725
Esi0132_0020	-2810.01	-2812.47	4.93425	0.0263295	expressed unknown protein (436) ;mRNA; r:2766105-2769900
Esi0056_0081	-7543.39	-7547.56	8.32939	0.00390088	CCAAT-binding factor (1360) ;mRNA; r:1755695-1774337
Esi0018_0155	-2745.23	-2747.5	4.54261	0.0330611	putative serine/threonine phosphatase 2C ptc2 (507) ;mRNA; f:4090343-4100234
Esi0014_0190	-3938.68	-3940.95	4.54046	0.0331026	DEAD box helicase (573) ;mRNA; f:7196820-7202461
Esi0028_0047	-6908.13	-6914.48	12.6995	0.000365744	DEAD box helicase (828) ;mRNA; r:5275171-5278923
Esi0010_0155	-2760.72	-2762.97	4.49017	0.0340903	Proline-rich protein PRCC (280) ;mRNA; r:4508675-4510610
Esi0231_0007	-6558.51	-6561.34	5.65197	0.0174358	Ankyrin repeat-containing domain (709) ;mRNA; r:4920312-4928794
Esi0226_0021	-4898.8	-4902.55	7.49925	0.00617248	WD40/YVTN repeat-like-containing domain (487) ;mRNA; r:6275972-6282993
Esi0064_0059	-2258.09	-2262.07	7.96786	0.00476152	RNA-binding domain, S1 (644) ;mRNA; f:2554396-2561892
Esi0072_0041	-6062.36	-6066.95	9.1708	0.00245907	Nicotinamide nucleotide transhydrogenase (883) ;mRNA; r:4285704-4302019
Esi0201_0024	-4521.93	-4518	-7.87007	0.00502598	Alpha-(1,2)-mannosyltransferase, family GT4 (559) ;mRNA; r:3070375-3074402
Esi0206_0060	-14856.6	-14859.5	5.78468	0.0161664	Peptidase C19, ubiquitin carboxyl-terminal hydrolase (2290) ;mRNA; r:3417892-3439896
Esi0010_0050	-5707.59	-5710.6	6.02978	0.0140665	Similar to dedicator of cytokinesis (1875) ;mRNA; f:3909096-3954151
Esi0029_0131	-3437.84	-3439.83	3.98289	0.0459646	Glutamate synthase (NADH/NADPH-dependent) (453) ;mRNA; r:790451-795738
Esi0010_0133	-5583.38	-5586.69	6.61509	0.0101118	eukaryotic initiation factor 2A (636) ;mRNA; r:4356202-4365419
Esi0002_0055	-5453.02	-5457.39	8.7503	0.00309552	Zinc finger, UBP-type (573) ;mRNA; r:6950419-6954457
Esi0223_0020	-3154.04	-3158.31	8.53327	0.00348712	Geranylgeranyl reductase (475) ;mRNA; f:3984517-3989827
Esi0065_0117	-765.506	-767.812	4.61192	0.0317504	Uncharacterised protein family UPF0434/Trm112 (126) ;mRNA; r:1132633-1135519
Esi0167_0071	-10976.3	-10982.8	12.997	0.000311989	Uncharacterised protein family FPL (1199) ;mRNA; f:4066917-4076561
Esi0115_0024	-3195.14	-3201.25	12.2106	0.000475198	conserved unknown protein (316) ;mRNA; f:5621616-5623295
Esi0229_0011	-3312.72	-3315.85	6.26163	0.012338	Ferric reductase transmembrane component-like domain (353) ;mRNA; f:6937815-6949238
Esi0159_0040	-13167.1	-13163.9	-6.30595	0.0120334	Uncharacterised domain NUC173 (1375) ;mRNA; r:6929756-6935565
Esi0014_0150	-7487.51	-7492.22	9.42709	0.00213804	SH2 domain containing protein (723) ;mRNA; r:6966706-6972950
Esi0069_0046	-1577.39	-1580.83	6.88229	0.0087054	Ubiquitin activating enzyme (E1) subunit UBA3 (504) ;mRNA; r:291645-298838
Esi0167_0009	-3825.92	-3827.89	3.92839	0.0474773	Major facilitator superfamily (643) ;mRNA; r:3804643-3818899
Esi0343_0032	-891.647	-893.697	4.09911	0.0429059	conserved unknown protein (241) ;mRNA; r:1237776-1245341
Esi0110_0022	-7685.49	-7687.62	4.26088	0.0389998	Vesicle transport protein, Use1 (884) ;mRNA; f:6110401-6119792
Esi0395_0004	-7086.15	-7089.08	5.86054	0.015484	Conserved oligomeric Golgi complex, subunit 3 (960) ;mRNA; f:5921698-5939073
Esi0355_0017	-1590.66	-1592.62	3.90855	0.0480409	Histidine phosphatase superfamily (425) ;mRNA; r:6433991-6437686
Esi0082_0074	-4755.27	-4752.9	-4.74937	0.0293091	poly(A) binding protein (689) ;mRNA; f:6096117-6103310
Esi0197_0044	-2895.66	-2899.44	7.56086	0.00596496	NAD(P)-binding domain (467) ;mRNA; r:4059083-4066609
Esi0207_0060	-2718.97	-2722.19	6.45148	0.011086	Uroporphyrinogen decarboxylase, chloroplast precursor (403) ;mRNA; r:265914-271273
Esi0156_0050	-3106.23	-3109.22	5.96805	0.0145674	Clathrin assembly complex, medium subunit (425) ;mRNA; r:5285742-5294552
Esi0062_0080	-7513.64	-7521.78	16.2806	5.4619e-05	EF-hand domain pair (1944) ;mRNA; r:3637616-3670424
Esi0090_0061	-4482.64	-4488.72	12.1656	0.00048679	Malate synthase (545) ;mRNA; f:3592302-3601085
Esi0070_0055	-4052.82	-4066.98	28.3264	1.02e-07	Armadillo-type fold (894) ;mRNA; f:4316825-4339264
Esi0212_0021	-2278.16	-2282.64	8.97085	0.00274321	Plastid ribosomal protein S1 (458) ;mRNA; f:2747155-2751816
Esi0024_0077	-3312.79	-3315.47	5.36	0.0206038	Metacaspase (354) ;mRNA; r:5153663-5159000
Esi0007_0052	-1168.18	-1170.26	4.14798	0.0416843	Ubiquitin-conjugating enzyme/RWD-like (155) ;mRNA; f:1632911-1639209
Esi0089_0014	-1473.29	-1476.88	7.16711	0.00742524	FeS cluster biogenesis (147) ;mRNA; f:2627047-2631871
Esi0062_0113	-4092.27	-4095.8	7.0754	0.00781494	Interferon-related developmental regulator, N-terminal (478) ;mRNA; f:3446588-3453227
Esi0058_0023	-3780.21	-3784.5	8.56471	0.00342742	CaaX prenyl protease Ste24 (487) ;mRNA; r:647528-652012
Esi0380_0014	-1772.48	-1774.43	3.88709	0.0486587	cytochrome b-561 domain protein (204) ;mRNA; f:1251871-1253571
Esi0198_0009	-3251.57	-3254.09	5.02961	0.0249175	Monogalactosyldiacylglycerol synthase, family GT28 (565) ;mRNA; r:2563602-2570128
Esi0074_0071	-2150.98	-2153.49	5.02692	0.0249562	P-loop containing nucleoside triphosphate hydrolase (527) ;mRNA; r:2442096-2451035
Esi0063_0067	-6204.2	-6219.95	31.5112	2e-08	Cytochrome P450 (775) ;mRNA; f:6176488-6182442
Esi0006_0131	-13946.5	-13948.4	3.84444	0.0499111	Rab3 GTPase-activating protein, non-catalytic subunit, distant homolog (1633) ;mRNA;
Esi0006_0107	-4248.53	-4251.26	5.45482	0.0195144	CRAL-TRIO domain (418) ;mRNA; f:5708921-5713143
Esi0105_0047	-3439.61	-3442.5	5.7907	0.0161112	Sas10/Utp3/C1D (467) ;mRNA; f:1736654-1745961
Esi0003_0066	-2310.16	-2312.35	4.38896	0.0361725	S-adenosyl-L-methionine-dependent methyltransferase (579) ;mRNA; f:1968188-1972923
Esi0017_0116	-1016.12	-1013.42	-5.39111	0.0202396	Ankyrin repeat-containing domain (2046) ;mRNA; r:810686-836181
Esi0038_0054	-2361.61	-2363.79	4.36231	0.0367424	Protein Iojap/ribosomal silencing factor RsfS (245) ;mRNA; f:1984584-1988241
Esi0411_0012	-4124.8	-4127.82	6.04225	0.0139675	Protein of unknown function DUF155 (555) ;mRNA; f:4919001-4926486
Esi0188_0005	-2358.85	-2364.32	10.9481	0.000936987	Glutamate ammonia ligase (335) ;mRNA; f:4395867-4400839
Esi0098_0077	-6674.27	-6687.81	27.0797	1.95e-07	Rossmann-like alpha/beta/alpha sandwich fold (1251) ;mRNA; r:945381-957679
Esi0057_0062	-5100.94	-5095.69	-10.5019	0.00119254	conserved unknown protein (775) ;mRNA; f:455374-462957
Esi0349_0016	-4453.33	-4456.71	6.76065	0.00931896	Ankyrin repeat-containing domain (586) ;mRNA; f:4433411-4435312
Esi0062_0007	-2500.56	-2502.57	4.01674	0.0450506	conserved unknown protein (467) ;mRNA; f:4030588-4038787
Esi0467_0005	-16009	-16013.6	9.1211	0.00252679	Target of rapamycin 1 (3332) ;mRNA; f:368334-431637
Esi0112_0005	-2948.61	-2956.4	15.5793	7.9116e-05	ferredoxin-NADP oxidoreductase (389) ;mRNA; f:1123121-1127880
Esi0167_0021	-1111.64	-1113.69	4.10142	0.0428473	Hypothetical UPF0043 protein slr0305 (441) ;mRNA; f:3857181-3861718
Esi0050_0080	-9245.6	-9242.55	-6.09855	0.0135293	conserved unknown protein (1549) ;mRNA; r:5804425-5813887
Esi0009_0087	-2183.34	-2187.4	8.11255	0.00439597	GINS complex, subunit Sld5 (237) ;mRNA; f:3073421-3078325
Esi0479_0020	-2432.95	-2436.67	7.44848	0.006349	EF-hand domain pair (346) ;mRNA; r:1667955-1669791
Esi0309_0016	-7555.72	-7559.08	6.72081	0.00952944	p-Aminobenzoate Synthase (C-terminal region) p-Aminobenzoate Synthase (N-terminal region) (1165)
Esi0022_0088	-2348.99	-2350.92	3.87317	0.0490638	EF-hand domain pair (471) ;mRNA; f:3749739-3764279
Esi0018_0097	-7130.41	-7136.28	11.739	0.000612034	conserved unknown protein (840) ;mRNA; r:4368917-4379197
Esi0164_0064	-3377.19	-3383.68	12.9872	0.000313624	chaperonin cpn60 (621) ;mRNA; r:4783741-4795515
Esi0516_0002	-4155.07	-4157.5	4.86602	0.0273906	Programmed cell death protein 2, C-terminal (553) ;mRNA; r:377308-380819
Esi0070_0111	-3122.76	-3125.78	6.04144	0.0139739	conserved unknown protein (304) ;mRNA; r:4049412-4053090
Esi0048_0061	-14319.9	-14328.2	16.7335	4.3014e-05	Zinc finger, N-recognin (2759) ;mRNA; r:2947035-2975742
Esi0035_0077	-4261.63	-4265.46	7.64672	0.00568756	Protein of unknown function DUF544 (508) ;mRNA; f:2794342-2807449
Esi0081_0020	-9358.57	-9364.44	11.7347	0.000613449	AIR synthase related protein, N-terminal domain (1168) ;mRNA; f:4999898-5007620
Esi0100_0070	-2630.61	-2634.69	8.15823	0.00428663	all0748 (324) ;mRNA; f:4925964-4932174
Esi0006_0045	-5140.81	-5142.87	4.11549	0.0424922	S-adenosyl-L-methionine-dependent methyltransferase (622) ;mRNA; f:5349459-5355488
Esi0101_0029	-6953.84	-6955.95	4.2129	0.0401176	conserved unknown protein (694) ;mRNA; f:1343417-1348923
Esi0023_0115	-1706.31	-1710.42	8.2258	0.0041299	Ribosomal protein L7/L12, C-terminal/adaptor protein ClpS-like (201) ;mRNA; r:1994472-1999752
Esi0003_0341	-2639.45	-2641.83	4.75481	0.0292166	Uncharacterised domain SAYSvFN (265) ;mRNA; f:3285294-3287802
Esi0413_0012	-13940	-13942.3	4.57377	0.032465	Nucleoporin, Nup133/Nup155-like, C-terminal (1513) ;mRNA; f:1699934-1721703
Esi0144_0073	-8154.54	-8152.59	-3.88301	0.0487772	expressed unknown protein (879) ;mRNA; f:1706718-1727093
Esi0026_0027	-6539.33	-6541.72	4.78742	0.0286683	Armadillo-type fold (688) ;mRNA; r:2221704-2228638
Esi0175_0026	-3082.24	-3084.47	4.47148	0.0344652	S-Adenosyl-Methionine synthetase (398) ;mRNA; r:6058997-6062721
Esi0007_0142	-5724.42	-5726.79	4.7513	0.0292762	Microtubule-associated protein, MAP65/Ase1/PRC1 (596) ;mRNA; f:2125285-2130734
Esi0080_0033	-4204.43	-4208.6	8.34486	0.0038678	ENTH/VHS (559) ;mRNA; r:3689970-3697704
Esi0103_0027	-2651.77	-2655.56	7.58649	0.00588073	hypothetical protein (352) ;mRNA; f:4937671-4939805
Esi0054_0105	-3357.66	-3359.84	4.35931	0.0368073	HotDog domain (556) ;mRNA; r:555043-562914
Esi0409_0022	-11405.6	-11410.1	8.85061	0.0029299	WD40 repeat (1935) ;mRNA; f:7967968-7981390
Esi0000_0198	-3281.07	-3283.39	4.65848	0.0309005	conserved unknown protein (388) ;mRNA; r:4960883-4965721
Esi0085_0010	-1601.71	-1608.07	12.7084	0.000364017	imm downregulated 23 (193) ;mRNA; f:527818-531810
Esi0022_0127	-1623.03	-1625.19	4.32905	0.0374672	Translation initiation factor SUI1 (213) ;mRNA; f:3517905-3521961
Esi0233_0010	-1637.89	-1635.82	-4.15626	0.0414808	S-adenosyl-L-methionine-dependent methyltransferase (1005) ;mRNA; r:760063-777890
Esi0006_0115	-5552.87	-5557.83	9.90453	0.00164873	arginine-N-methyltransferase. (740) ;mRNA; f:5753623-5764340
Esi0104_0077	-2186.64	-2189.26	5.24865	0.0219638	conserved unknown protein (279) ;mRNA; r:3601819-3608058
Esi0056_0017	-3655.96	-3659.49	7.06057	0.00787991	hypothetical protein (586) ;mRNA; f:2144320-2155142
Esi0002_0190	-5077.28	-5080.41	6.26478	0.0123161	Mini-chromosome maintenance, DNA-dependent ATPase (1060) ;mRNA; f:6201439-6219733
Esi0058_0140	-4312.98	-4315.2	4.45035	0.0348941	STAS domain (834) ;mRNA; f:63027-75045
Esi0474_0016	-1576.79	-1580.66	7.74018	0.00540055	conserved unknown protein (188) ;mRNA; f:1203384-1210302
Esi0144_0003	-8112.7	-8115.92	6.45038	0.0110929	conserved unknown protein (867) ;mRNA; r:2097116-2100787
Esi0326_0032	-2599.15	-2602.27	6.24623	0.0124458	dihydrolipoamide acetyltransferase (600) ;mRNA; f:101673-111426
Esi0211_0009	-2405.99	-2408.2	4.43078	0.0352963	sperm flagellar energy carrier protein (306) ;mRNA; r:4949403-4953769
Esi0003_0328	-5987.27	-5995.02	15.4992	8.2539e-05	Ankyrin, TRAF-type zinc finger protein (2921) ;mRNA; f:3207378-3233682
Esi0192_0021	-17065.4	-17070.5	10.239	0.00137504	BEACH domain (2872) ;mRNA; f:4208535-4225994
Esi0197_0038	-8567.48	-8572.21	9.45153	0.00210973	T-complex 11 (1140) ;mRNA; f:4032494-4042234
Esi0387_0015	-2501.91	-2507.74	11.6729	0.000634179	Bile acid:sodium symporter/arsenical resistance protein Acr3 (257) ;mRNA; f:3990233-3993934
Esi0224_0054	-1090.44	-1092.86	4.8311	0.0279507	Soluble NSF Attachment Protein (SNAP) Receptor (SNARE) (376) ;mRNA;
Esi0000_0409	-3002.43	-3004.76	4.65292	0.0310007	ATP synthase gamma chain (377) ;mRNA; r:3700794-3704123
Esi0008_0117	-10726.1	-10734.4	16.6304	4.5418e-05	PDZ domain (1161) ;mRNA; r:9708987-9716852
Esi0062_0083	-10860.1	-10862.1	3.85199	0.049687	conserved unknown protein (1713) ;mRNA; r:3616377-3627680
Esi0236_0015	-562.167	-564.315	4.29608	0.0382004	TALE homeobox domain transcription factor (631) ;mRNA; f:532272-536809
Esi0077_0067	-8206	-8213.44	14.882	0.000114448	conserved unknown protein (907) ;mRNA; f:2133888-2139922
Esi0091_0086	-10807.9	-10803	-9.76809	0.00177567	conserved unknown protein (1235) ;mRNA; r:2978528-2993801
Esi0049_0059	-11213.6	-11217.4	7.47175	0.00626747	eIF-2alpha kinase GCN2 similar to Eukaryotic translation initiation factor
Esi0012_0107	-2108.34	-2110.42	4.15874	0.0414203	conserved unknown protein (297) ;mRNA; r:637027-645307

## Sheet: table S2
Table S2. List of genes under positive selection in S. japonica, including gene ID, lnL value, χ2, p value and annotation.
gene ID	lnL1	lnL2	χ2	p value	annotation
Esi0037_0030	-7217.4	-7223.04	11.2809	0.000783092	Cation/H+ exchanger (892) ;mRNA; f:5463127-5475622
Esi0320_0007	-7257.67	-7260.72	6.08679	0.0136197	Helicase, C-terminal (1410) ;mRNA; r:4190764-4206745
Esi0233_0009	-2799.24	-2802.21	5.935	0.0148431	Choline transporter-like (647) ;mRNA; r:746061-757591
Esi0049_0012	-2973.97	-2976.7	5.45555	0.0195062	Ubiquitin-associated/translation elongation factor EF1B, N-terminal, eukaryote (380) ;mRNA; r:5363874-5370651
Esi0043_0098	-7101.6	-7103.63	4.05354	0.0440789	conserved unknown protein (1139) ;mRNA; r:5577827-5591065
Esi0309_0053	-6402.62	-6407.52	9.80385	0.00174146	C2 domain (1044) ;mRNA; r:999745-1003678
Esi0145_0073	-5556.06	-5553.87	-4.37607	0.0364469	Uncharacterised domain NUC130/133, N-terminal (767) ;mRNA; f:3754515-3764227
Esi0047_0050	-2764.17	-2766.88	5.4156	0.0199576	SPX, N-terminal (290) ;mRNA; r:2350808-2359299
Esi0018_0060	-4701.15	-4707.3	12.2987	0.000453272	Ferrochelatase-2, putative chloroplast precursor (583) ;mRNA; f:4601493-4607037
Esi0515_0001	-2048.08	-2052.13	8.10204	0.00442154	WD40/YVTN repeat-like-containing domain (242) ;mRNA; r:10542888-10547630
Esi0163_0051	-10200	-10201.9	3.95419	0.0467549	conserved unknown protein (1306) ;mRNA; r:8888076-8894982
Esi0228_0041	-2907.72	-2909.93	4.42013	0.0355173	Solute carrier family 35 member SLC35F1/F2/F6 (444) ;mRNA; f:631356-636327
Esi0036_0121	-2698.16	-2701.59	6.86221	0.00880375	CobW/HypB/UreG domain (409) ;mRNA; f:2044911-2056164
Esi0139_0013	-3177.93	-3180.5	5.12541	0.023578	Alpha/Beta hydrolase fold (558) ;mRNA; r:3067755-3078333
Esi0037_0092	-18481.9	-18483.9	3.91168	0.0479516	P-loop containing nucleoside triphosphate hydrolase (2573) ;mRNA; r:5087372-5106571
Esi0255_0013	-3830.51	-3835.46	9.89151	0.00166043	expressed unknown protein (557) ;mRNA; f:7020970-7028836
Esi0189_0033	-2174.28	-2176.24	3.92104	0.0476854	conserved unknown protein (384) ;mRNA; r:4405319-4410466
Esi0004_0101	-6568.05	-6573.07	10.0453	0.0015274	conserved unknown protein (1138) ;mRNA; f:3827546-3844885
Esi0362_0023	-3019.37	-3021.91	5.08089	0.0241909	Septum formation inhibitor MinC (313) ;mRNA; r:1917384-1922423
Esi0189_0027	-2745.61	-2749.21	7.18324	0.00735878	Batten's disease protein Cln3 (380) ;mRNA; r:4388814-4390911
Esi0004_0272	-2697.86	-2699.91	4.10034	0.0428747	Peptidase S8, subtilisin-related (1388) ;mRNA; r:4826233-4858400
Esi0126_0082	-2533.11	-2535.78	5.3359	0.0208906	TspO/MBR-related protein (303) ;mRNA; f:3377066-3383170
Esi0210_0040	-2184.93	-2188.97	8.08488	0.00446361	Rrp4 is a component of the exosome 3'->5' exoribonuclease complex, a
Esi0044_0073	-3302.17	-3304.32	4.29544	0.0382146	conserved unknown protein (728) ;mRNA; f:4260777-4273480
Esi0476_0012	-1489.3	-1492.96	7.32362	0.0068054	conserved unknown protein (175) ;mRNA; r:5405636-5407918
Esi0174_0039	-2276.81	-2279.2	4.77204	0.0289255	Alpha/beta hydrolase fold-3 (371) ;mRNA; f:2915259-2919009
Esi0552_0008	-4353.85	-4355.86	4.02232	0.044902	Sodium/potassium/calcium exchanger (630) ;mRNA; r:11777478-11781060
Esi0475_0008	-1765.25	-1767.86	5.22046	0.0223226	conserved unknown protein (271) ;mRNA; f:9448766-9452960
Esi0166_0052	-4091.03	-4093.9	5.73713	0.0166099	Zinc finger, RanBP2-type (619) ;mRNA; r:3669025-3674528
Esi0270_0029	-2856.04	-2861.55	11.0236	0.000899611	MPBQ/MSBQ transferase (462) ;mRNA; f:4864388-4874810
Esi0085_0036	-3767.41	-3771.23	7.63573	0.00572231	Cation efflux protein (591) ;mRNA; r:391685-398642
Esi0182_0058	-3135.04	-3138.04	6.00264	0.0142845	recombinase A (454) ;mRNA; r:1234459-1240091
Esi0125_0019	-2319.92	-2321.88	3.91185	0.0479467	FK506-binding protein 3 (Peptidyl-prolyl cis-trans isomerase) (PPIase) (Rotamase) (235) ;mRNA; r:4878043-4882747
Esi0070_0009	-5495.21	-5501.06	11.7106	0.000621441	Small-subunit processome, Utp12 (1042) ;mRNA; f:4519288-4533772
Esi0052_0197	-2674.67	-2677.26	5.17986	0.0228501	Nucleic acid-binding, OB-fold (330) ;mRNA; r:4102063-4109249
Esi0032_0004	-3339.75	-3343.19	6.88188	0.0087074	PDZ domain (561) ;mRNA; r:3805897-3814773
Esi0298_0026	-882.722	-885.298	5.15182	0.023222	Histone H2A.X (135) ;mRNA; f:3817540-3818186
Esi0343_0033	-2385.42	-2387.57	4.3078	0.037938	SGF29 tudor-like domain (271) ;mRNA; r:1222166-1235675
Esi0002_0129	-2596.4	-2598.67	4.54189	0.0330751	NA
Esi0183_0062	-3027.35	-3029.47	4.23473	0.039605	Patatin/Phospholipase A2-related (341) ;mRNA; f:5065124-5068578
Esi0067_0007	-909.398	-912.72	6.64329	0.00995301	2Fe-2S ferredoxin-type domain (299) ;mRNA; r:7662380-7665443
Esi0028_0127	-4040.05	-4042.24	4.36631	0.0366563	Yme1 homolog, mitochondrial inner membrane i-AAA protease (749) ;mRNA; f:5708804-5718126
Esi0100_0031	-3280.33	-3284.69	8.71076	0.00316338	Triose-phosphate transporter domain (409) ;mRNA; r:5159110-5164861
Esi0099_0095	-3901.86	-3903.94	4.15872	0.0414208	Alb3 homolog, thylakoidal inner membrane insertase (450) ;mRNA; r:4228013-4237124
Esi0243_0024	-6100.18	-6102.2	4.03199	0.0446452	Trehalose 6-phosphate synthase, family GT20 / Trehalose 6-phosphate phosphatase (1038) ;mRNA;
Esi0099_0059	-5429.54	-5434.38	9.68859	0.00185416	P-loop containing nucleoside triphosphate hydrolase (819) ;mRNA; r:4036157-4050185
Esi0155_0064	-3915.24	-3917.2	3.9266	0.0475278	NADH dehydrogenase (ubiquinone) (544) ;mRNA; r:5822744-5832906
Esi0000_0557	-1586.92	-1589.45	5.06799	0.0243717	conserved unknown protein (170) ;mRNA; f:2911463-2913371
Esi0098_0081	-7700.72	-7702.69	3.9558	0.0467101	E3 UFM1-protein ligase 1 (1078) ;mRNA; f:984430-1002325
Esi0096_0014	-1091.67	-1093.7	4.06093	0.0438863	expressed unknown protein (168) ;mRNA; r:4648285-4651866
Esi0991_0001	-2359.91	-2362.52	5.2138	0.0224083	Folate-sensitive fragile site protein Fra10Ac1 (251) ;mRNA; f:18881461-18883369
Esi0035_0150	-4743.53	-4746.12	5.18586	0.0227715	m-AAA protease subunit, Afg3/Yta10-like protein (932) ;mRNA; f:3256938-3274827
Esi0007_0007	-11730.3	-11736.3	12.0966	0.000505152	RNA polymerase, N-terminal (1900) ;mRNA; f:1344084-1367978
Esi0002_0180	-2948.58	-2953.28	9.40492	0.00216404	UDP-glucuronate decarboxylase (488) ;mRNA; f:6274840-6285456
Esi0395_0018	-3612.13	-3606.99	-10.2818	0.00134352	RNA polymerase Rpb2, OB-fold (452) ;mRNA; r:6037858-6047842
Esi0166_0034	-4564.3	-4567.67	6.72419	0.00951138	Zinc finger, RING-type (525) ;mRNA; r:3764737-3769804
Esi0099_0040	-7690.69	-7693	4.63492	0.0313277	Endo-1,3-beta-glucanase, family GH81 (1017) ;mRNA; f:3941405-3955435
Esi0100_0078	-3512.94	-3516.13	6.37429	0.0115785	conserved unknown protein (587) ;mRNA; r:4881764-4892097
Esi0206_0009	-2415.17	-2423.5	16.6664	4.4564e-05	Mitochondrial carrier domain (306) ;mRNA; r:3177412-3183512
Esi0046_0005	-2734.13	-2736.15	4.03897	0.0444608	conserved unknown protein (424) ;mRNA; r:4243668-4254406
Esi0210_0039	-1978.96	-1981.82	5.70757	0.0168919	eukaryotic initiation factor eIF3 i subunit p36 (286) ;mRNA; r:1826526-1835412
Esi0115_0037	-2481.9	-2490.05	16.3106	5.3763e-05	conserved unknown protein (839) ;mRNA; r:5683999-5687508
Esi0065_0074	-4731.23	-4735.47	8.47635	0.00359793	DEAD box helicase (658) ;mRNA; f:852252-870155
Esi0309_0011	-3273.44	-3275.38	3.8859	0.0486931	C2H2 zinc finger protein (355) ;mRNA; r:857828-860460
Esi0172_0034	-19922.7	-19920.7	-4.13044	0.0421184	conserved unknown protein (2254) ;mRNA; f:3138657-3159545
Esi0192_0041	-1843.5	-1845.54	4.08428	0.0432838	Glutathione peroxidase (265) ;mRNA; r:4070079-4079774
Esi0098_0013	-4049.16	-4052.07	5.81845	0.0158589	Protein prenyltransferase, alpha subunit (563) ;mRNA; r:569319-573738
Esi0199_0035	-5206.94	-5208.9	3.9077	0.0480653	Heat Shock transcription factor (1191) ;mRNA; r:1643619-1659113
Esi0094_0014	-2041.49	-2044.46	5.93834	0.014815	Endonuclease/exonuclease/phosphatase (210) ;mRNA; f:2679567-2682669
Esi0081_0013	-3548.24	-3552.01	7.53906	0.00603754	Arf GTPase activating protein (550) ;mRNA; f:4952301-4956787
Esi0020_0183	-7389.38	-7391.6	4.44301	0.0350444	Pyruvate, phosphate dikinase (947) ;mRNA; f:1248047-1263320
Esi0233_0006	-2836.67	-2839.06	4.77189	0.0289281	DUF71 domain (339) ;mRNA; r:734630-741465
Esi0163_0035	-1354.13	-1357.62	6.98796	0.00820597	Histidine phosphatase superfamily (496) ;mRNA; r:8811749-8817660
Esi0068_0079	-2744.28	-2746.71	4.85915	0.0274999	Casein kinase (708) ;mRNA; f:3396331-3448255
Esi0171_0012	-3259.8	-3261.92	4.25878	0.0390479	conserved unknown protein (807) ;mRNA; r:2909445-2920300
Esi0015_0069	-25495	-25504	18.0081	2.1997e-05	Armadillo-like helical (3347) ;mRNA; f:2273037-2312573
Esi0320_0011	-1857.89	-1860.19	4.6045	0.0318882	3-ketoacyl-CoA thiolase (384) ;mRNA; f:4217738-4227215
Esi0087_0032	-2289.76	-2292.53	5.54739	0.0185083	Cysteinyl-tRNA Synthetase (665) ;mRNA; r:1427876-1432137
Esi0000_0342	-4312.31	-4315.57	6.51959	0.0106692	Nin one binding (NOB1) Zn-ribbon-like (557) ;mRNA; f:4082775-4087713
Esi0071_0031	-4279.26	-4283.77	9.0124	0.00268154	Histidyl-tRNA Synthetase (C-terminal region) Histidyl-tRNA Synthetase (N-terminal region) (577) ;mRNA; f:4820323-4829704
Esi0226_0014	-9282.4	-9286.12	7.44291	0.00636869	Beta-galactosidase, family GH2 (1588) ;mRNA; r:6310488-6324376
Esi0024_0157	-1460.19	-1462.18	3.98489	0.0459102	P-loop containing nucleoside triphosphate hydrolase (176) ;mRNA; f:5571325-5574491
Esi0198_0021	-6027.6	-6029.57	3.94523	0.0470045	Transketolase-like, pyrimidine-binding domain (691) ;mRNA; r:2648621-2663108
Esi0017_0119	-5124.67	-5128.62	7.90056	0.00494194	Monooxygenase (857) ;mRNA; f:836700-842567
Esi0058_0014	-3243.78	-3247.73	7.89263	0.00496366	Terpenoid cyclases/protein prenyltransferase alpha-alpha toroid (345) ;mRNA; f:677607-683072
Esi0000_0346	-5469.78	-5474.03	8.49061	0.00356984	Chromosome segregation protein SMC (574) ;mRNA; r:4071158-4082555
Esi0045_0080	-5212.43	-5215.01	5.17558	0.0229065	Putative ATP-dependent RNA helicase, partial. (2022) ;mRNA; r:1399332-1425844
Esi0268_0018	-11687.1	-11693.9	13.6167	0.000224186	RNA polymerase III, largest subunit (1519) ;mRNA; r:3414725-3444992
Esi0048_0062	-2532.16	-2538.88	13.4486	0.000245187	Indole-3-glycerol-phosphate synthase (C-terminal region) Indole-3-glycerol-phosphate synthase (N-ter (388) ;mRNA; f:2976247-2983203
Esi0012_0133	-5493.17	-5501.3	16.2568	5.5311e-05	Pyridine nucleotide-disulphide oxidoreductase, FAD/NAD(P)-binding domain (928) ;mRNA; r:446434-454566
Esi0180_0019	-6789.54	-6792.14	5.19526	0.0226485	[Skp1-protein]-hydroxyproline N-acetylglucosaminyltransferase, family GT60 (734) ;mRNA; r:3199787-3211429
Esi0187_0017	-2703.77	-2705.92	4.31091	0.0378687	conserved unknown protein (483) ;mRNA; r:645023-652071
Esi0046_0111	-2070.96	-2074.06	6.18884	0.0128559	Mitochondrial carrier domain (293) ;mRNA; r:3663668-3668298
Esi0063_0064	-6509.69	-6506.23	-6.91162	0.00856376	PUB domain (769) ;mRNA; f:6159815-6164391
Esi0008_0205	-3250.68	-3253.04	4.7058	0.030061	SNF1-related protein kinase (762) ;mRNA; f:9255864-9265456
Esi0013_0131	-2481.83	-2484.08	4.48509	0.0341917	Potassium channel, inwardly rectifying, Kir (769) ;mRNA; r:1857194-1867496
Esi0170_0046	-8286.56	-8290.09	7.05492	0.00790478	Peptidase C48, SUMO/Sentrin/Ubl1 (1322) ;mRNA; r:823875-835974
Esi0044_0104	-3097.87	-3100.43	5.13132	0.0234978	LRAT-like domain (350) ;mRNA; r:4120993-4125164
Esi0007_0202	-2210.54	-2212.93	4.77006	0.0289589	Protein-tyrosine phosphatase-like (394) ;mRNA; f:2408123-2411866
Esi0090_0052	-2335.88	-2340.28	8.80826	0.0029987	conserved unknown protein (338) ;mRNA; f:3647904-3651451
Esi0018_0112	-3500.38	-3503.73	6.68419	0.00972717	conserved unknown protein (304) ;mRNA; f:4287365-4290195
Esi0180_0012	-6627.29	-6629.66	4.73664	0.0295267	Cyclic nucleotide-binding domain (766) ;mRNA; r:3246388-3258996
Esi0014_0051	-1937.17	-1940.88	7.41236	0.00647772	Peptidyl-prolyl cis-trans isomerase (457) ;mRNA; r:6457142-6465819
Esi0148_0015	-2122.94	-2124.88	3.87861	0.0489051	riboflavin biosynthesis protein (540) ;mRNA; f:5636448-5642249
Esi0029_0020	-6475.65	-6477.61	3.90979	0.0480055	Nuclear control of ATP synthase 2 (715) ;mRNA; r:81230-91802
Esi0455_0007	-2266.32	-2263.81	-5.01012	0.0251995	Mitochondrial glycoprotein (261) ;mRNA; r:6030316-6035349
Esi0091_0058	-3442.82	-3445.08	4.51717	0.0335563	S-Adenosyl homocysteine hydrolase (480) ;mRNA; r:2890291-2892981
Esi0134_0069	-9091.26	-9097.27	12.0241	0.000525169	P-loop containing nucleoside triphosphate hydrolase (992) ;mRNA; r:6373174-6378086
Esi0018_0145	-8080.08	-8083.39	6.6183	0.0100936	Protein kinase C-like, phorbol ester/diacylglycerol-binding domain (1076) ;mRNA; r:4158041-4161971
Esi0213_0053	-5100.83	-5104.18	6.6982	0.00965105	Dynactin subunit 4 (710) ;mRNA; r:3804518-3809392
Esi0139_0070	-4670.87	-4672.83	3.91346	0.0479009	conserved unknown protein (613) ;mRNA; r:2729510-2736187
Esi0300_0018	-1710.21	-1712.67	4.92941	0.0264033	Light harvesting complex protein (212) ;mRNA; f:4377571-4382718
Esi0051_0080	-10392.3	-10394.5	4.33537	0.0373282	Domain of unknown function DUF547 (1573) ;mRNA; f:5204375-5228323
Esi0277_0038	-3854.02	-3858.7	9.37938	0.0021944	MutS protein homolog 4 (918) ;mRNA; r:8422042-8437557
Esi0164_0029	-4007.73	-4010.58	5.6917	0.0170453	WD40/YVTN repeat-like-containing domain (615) ;mRNA; r:4987463-5000167
Esi0334_0024	-8197.22	-8200.96	7.47752	0.00624742	UBA/THIF-type NAD/FAD binding fold (1087) ;mRNA; f:5286365-5307178
Esi0024_0005	-10159.7	-10162.2	4.88495	0.0270919	expressed unknown protein (1912) ;mRNA; f:4730343-4751403
Esi0322_0025	-5597.44	-5593.74	-7.39628	0.00653589	P-loop containing nucleoside triphosphate hydrolase (736) ;mRNA; f:124970-134894
Esi0240_0011	-2669.38	-2672.79	6.81825	0.00902309	mitochondrial pyrimidine nucleotide transporter (456) ;mRNA; f:1915786-1921088
Esi0180_0004	-4614.44	-4617.19	5.50646	0.0189464	lipase (525) ;mRNA; r:3283343-3286605
Esi0132_0050	-5312.8	-5315	4.39837	0.0359733	Acyl transferase/acyl hydrolase/lysophospholipase (583) ;mRNA; f:2592008-2599405
Esi0006_0225	-10024.2	-10027.2	6.09265	0.0135746	nonribosomal peptide synthetase 10 (1464) ;mRNA; f:6447401-6475363
Esi0044_0001	-4046.57	-4049.06	4.9755	0.0257088	Armadillo-type fold (671) ;mRNA; f:4689812-4700878
Esi0003_0133	-5026.25	-5029.45	6.41424	0.0113209	C2H2 zinc finger protein (593) ;mRNA; r:2333417-2335195
Esi0013_0033	-7665.51	-7668.03	5.04017	0.024766	GPI inositol-deacylase PGAP1-like (1049) ;mRNA; r:1363528-1372349
Esi0257_0009	-3146.74	-3152.76	12.0391	0.000520968	Peroxin-3 domain (711) ;mRNA; r:1744641-1755798
Esi0626_0001	-2114.95	-2120.67	11.4388	0.000719265	Ribonuclease E inhibitor RraA/Dimethylmenaquinone methyltransferase (212) ;mRNA; f:5515766-5522286
Esi0187_0015	-7745.11	-7750.54	10.8536	0.000986015	conserved unknown protein (344) ;mRNA; r:6486926-6491895
Esi0128_0034	-2198.98	-2201.04	4.13217	0.0420754	Serine/threonine-specific protein phosphatase/bis(5-nucleosyl)-tetraphosphatase (491) ;mRNA; f:3667700-3675088
Esi0172_0058	-4415.14	-4422.18	14.0778	0.000175406	Phosphomevalonate kinase (572) ;mRNA; f:3260738-3264920
Esi1160_0001	-3194.61	-3197.57	5.91596	0.0150044	F-box domain (322) ;mRNA; r:914937-915975
Esi0198_0012	-2954.67	-2956.75	4.17751	0.0409638	conserved unknown protein (220) ;mRNA; r:2586014-2586940
Esi0098_0043	-4576.47	-4580.31	7.68622	0.0055644	conserved unknown protein (715) ;mRNA; r:755789-762955
Esi0186_0038	-6096.99	-6101.97	9.96727	0.00159348	conserved unknown protein (974) ;mRNA; r:8620634-8635660
Esi0342_0005	-2124.62	-2127.28	5.32739	0.0209928	conserved unknown protein (249) ;mRNA; r:3440797-3443812
Esi0032_0125	-2312.62	-2315.38	5.5147	0.0188573	elongation factor P (258) ;mRNA; r:4508780-4515040
Esi0106_0099	-15454.1	-15457.6	7.08062	0.0077922	P-loop containing nucleoside triphosphate hydrolase (1530) ;mRNA; r:6456267-6467943
Esi0018_0008	-2032.41	-2034.71	4.59202	0.0321211	Similar to photosystem II oxygen evolving complex protein PsbP in Synechococcus
Esi0000_0300	-1992.64	-1994.57	3.86383	0.0493376	unknown (338) ;mRNA; f:4357584-4362865
Esi0063_0032	-10740.2	-10743.8	7.29582	0.00691154	Magnesium chelatase subunit H, putative chloroplast precursor (1443) ;mRNA; r:5979828-5997042
Esi0030_0003	-3391.87	-3394.93	6.12833	0.0133033	Pyridine nucleotide-disulphide oxidoreductase, FAD/NAD(P)-binding domain (401) ;mRNA; r:2819750-2826576
Esi0231_0014	-5303.89	-5306.08	4.3778	0.0364099	putative, spindle assembly abnormal protein 6 (735) ;mRNA; f:4971924-4976235
Esi0054_0060	-11973.1	-11975.6	5.01727	0.0250957	Domain of unknown function DUF2183 (1860) ;mRNA; r:781930-799067
Esi0006_0148	-4183.6	-4186.28	5.35632	0.0206473	Chaperone (559) ;mRNA; r:5991132-5998843
Esi0046_0135	-3285.2	-3288.14	5.88026	0.0153115	Zinc finger, RING-type (486) ;mRNA; r:3490727-3497179
Esi0144_0063	-3580.02	-3583.09	6.14284	0.0131945	HhH-GPD domain (420) ;mRNA; f:1799200-1803276
Esi0004_0227	-3289.97	-3292.53	5.12791	0.0235441	Pseudouridine synthase, RsuA/RluB/C/D/E/F (509) ;mRNA; r:4568711-4573301
Esi0018_0110	-3227.12	-3231.25	8.25884	0.00405541	expressed unknown protein (342) ;mRNA; f:4302682-4304832
Esi0180_0016	-2702.86	-2706.9	8.09054	0.0044497	Methyltransferase domain (440) ;mRNA; r:3219379-3229807
Esi0002_0151	-4387.51	-4391.44	7.84735	0.00508953	similar to MGC81978 protein (469) ;mRNA; f:6449284-6453684
Esi0000_0440	-6105.18	-6103.14	-4.07591	0.0434987	expressed unknown protein (1595) ;mRNA; r:3549702-3571354
Esi0202_0050	-2653.24	-2655.41	4.33744	0.0372829	S-adenosyl-L-methionine-dependent methyltransferase (349) ;mRNA; f:5576772-5577880
Esi0030_0091	-3286.02	-3292.15	12.2494	0.000465411	Rhodanese-like domain (452) ;mRNA; f:3265426-3271614
Esi0004_0259	-11581.6	-11586.2	9.03882	0.00264306	Domain of unknown function DUF547 (1742) ;mRNA; f:4748791-4773073
Esi0073_0048	-2667.42	-2670.11	5.39186	0.0202308	DNA polymerase family X lyase domain (281) ;mRNA; f:1213650-1221002
Esi0044_0049	-3443.8	-3445.95	4.29533	0.0382171	Proteasome component (PCI) domain (499) ;mRNA; r:4419596-4429894
Esi0013_0043	-21730.5	-21725.5	-9.94017	0.00161711	expressed unknown protein (3547) ;mRNA; f:1395292-1430771
Esi0142_0041	-4340.25	-4344.79	9.07735	0.00258794	Molecular chaperones HSP70/HSC70, HSP70 superfamily (659) ;mRNA; r:3396886-3400665
Esi0349_0012	-4020.6	-4023.17	5.14845	0.0232671	pyruvate kinase (505) ;mRNA; f:4400253-4411255
Esi0304_0006	-3169.1	-3173.31	8.41492	0.00372154	K Homology domain, type 1 (334) ;mRNA; r:4311333-4315198
Esi0047_0106	-3504.72	-3508.85	8.2735	0.0040228	Histidinol dehydrogenase (427) ;mRNA; r:2040942-2048654
Esi0024_0069	-7092.24	-7095.77	7.06226	0.00787248	hypothetical protein (1442) ;mRNA; r:5088617-5101326
Esi0100_0096	-3399.93	-3404.38	8.90604	0.00284228	ubiquitin-conjugating enzyme E2-binding protein 1 (519) ;mRNA; f:4786456-4792411
Esi0228_0005	-5775.53	-5779.84	8.62767	0.00331095	NatC N(alpha)-terminal acetyltransferase, Mak10 subunit (1235) ;mRNA; r:449009-460872
Esi0009_0210	-3414.1	-3417.56	6.92345	0.00850725	Peptidase A22A, presenilin (602) ;mRNA; f:2393562-2401460
Esi0153_0024	-2577.03	-2581.94	9.81205	0.00173372	chitinase-domain containing protein (472) ;mRNA; r:8934516-8943596
Esi0081_0107	-6734.1	-6738.74	9.28758	0.00230712	Domain of unknown function DUF4332 (891) ;mRNA; r:5484456-5489421
Esi0032_0117	-1600.5	-1603.17	5.34629	0.0207664	RNA polymerase Rpb7, N-terminal (271) ;mRNA; r:4470144-4476569
Esi0314_0023	-3758.93	-3761	4.14459	0.0417678	Zinc finger, RING-type (505) ;mRNA; r:626308-634467
Esi0229_0053	-2837.46	-2841.53	8.12758	0.00435968	mRNA splicing factor, Cwf21 (1238) ;mRNA; r:6715405-6742836
Esi0085_0102	-5996.37	-5998.37	4.01716	0.0450395	Endonuclease/exonuclease/phosphatase (754) ;mRNA; f:133406-136075
Esi0018_0211	-3428.2	-3432.17	7.94556	0.00482055	MutS protein homolog 1A (619) ;mRNA; f:3821469-3828634
Esi0053_0033	-2535.78	-2541.07	10.5821	0.00114187	DHS-like NAD/FAD-binding domain (274) ;mRNA; f:1956937-1959259
Esi0418_0021	-5738.8	-5743.51	9.43015	0.00213447	Peptidase M16, C-terminal domain (856) ;mRNA; r:1334180-1352461
Esi0002_0041	-2644.15	-2647.51	6.72236	0.00952113	conserved unknown protein (371) ;mRNA; r:7005269-7012002
Esi0082_0090	-3567.23	-3571.02	7.58398	0.00588894	Domain of unknown function DUF1767 (735) ;mRNA; r:6212808-6217982
Esi0000_0144	-1245.7	-1248.74	6.07437	0.0137157	carbonic anhydrase alpha type (296) ;mRNA; r:5244299-5253548
Esi0312_0018	-2136.43	-2140.26	7.65969	0.00564682	Armadillo-like helical (321) ;mRNA; f:4392455-4397863
Esi0055_0021	-2064.35	-2066.68	4.65815	0.0309065	NA
Esi0240_0024	-2633.55	-2637.11	7.11688	0.00763617	glyceraldehyde 3-phosphate dehydrogenase (386) ;mRNA; f:2005542-2008955
Esi0133_0050	-2956.71	-2960.61	7.80193	0.00521904	Nuclease associated modular domain 3 (418) ;mRNA; f:5624587-5630170
Esi0028_0022	-11186.4	-11197.9	23.0088	1.613e-06	WD40-repeat-containing domain (1746) ;mRNA; r:5090186-5100602
Esi0006_0117	-12577	-12580.5	7.01923	0.00806388	Armadillo-like helical (2367) ;mRNA; r:5767112-5795871
Esi0292_0033	-3672.79	-3676.15	6.71334	0.00956944	putative phosphate/phosphoenolpyruvate translocator precursor protein (415) ;mRNA; f:8213043-8216089
Esi0141_0037	-1535.66	-1539.03	6.74287	0.00941229	Predicted HD phosphohydrolase (238) ;mRNA; r:1176521-1179060
Esi0087_0054	-14947.6	-14951.3	7.36875	0.00663671	SAC3/GANP/Nin1/mts3/eIF-3 p25 (2544) ;mRNA; r:1293851-1309085
Esi0000_0119	-1825.41	-1827.98	5.1398	0.0233833	Transcription initiation factor TAFII31 (190) ;mRNA; f:5386069-5389684
Esi0035_0107	-3369.08	-3371.75	5.33888	0.0208548	expressed unknown protein (351) ;mRNA; r:2961837-2967290
Esi0246_0037	-3536.82	-3540.23	6.82068	0.00901084	Tyrosine/serine-protein phosphatase IphP-type (541) ;mRNA; f:3013922-3020872
Esi0489_0018	-1862.35	-1865.78	6.85338	0.00884739	SWIB/MDM2 domain (325) ;mRNA; r:5473110-5481154
Esi0320_0016	-15470.8	-15476.8	11.9291	0.000552628	tRNA (guanine-N1-)-methyltransferase, N-terminal (1771) ;mRNA; f:4241232-4264949
Esi0367_0001	-7832.9	-7834.85	3.89999	0.0482865	Autophagy-related protein 9 (986) ;mRNA; f:3350680-3363331
Esi0203_0053	-9975.71	-9983.06	14.6841	0.000127117	hypothetical protein (1062) ;mRNA; r:7726392-7740909
Esi0119_0029	-5803.53	-5805.62	4.17164	0.0411059	Transporter-associated domain (779) ;mRNA; f:1302119-1311090
Esi0345_0012	-1885.87	-1883.78	-4.1755	0.0410125	Double-stranded RNA-binding domain (282) ;mRNA; r:3318078-3321685
Esi0034_0065	-5376.88	-5383.61	13.4659	0.000242945	Diphthamide biosynthesis protein 2, putative (898) ;mRNA; r:3869006-3876167
Esi0520_0004	-2668.39	-2670.49	4.20528	0.0402984	4-diphosphocytidyl-2C-methyl-D-erythritol synthase, chloroplast precursor (367) ;mRNA; f:7129680-7137809
Esi0392_0021	-18754.2	-18756.3	4.21766	0.0400053	Proteasome component ECM29/Translational activator GCN1 (2284) ;mRNA; r:4950726-4965711
Esi0133_0079	-4519.68	-4522.41	5.4608	0.0194477	Glycyl-tRNA Synthetase (408) ;mRNA; r:5772682-5779079
Esi0226_0001	-4327.68	-4331.37	7.39048	0.00655701	Choline transporter-like (496) ;mRNA; r:6362831-6377671
Esi0216_0009	-934.933	-938.888	7.91018	0.00491574	Nucleotide-binding alpha-beta plait domain (222) ;mRNA; f:2353950-2363957
Esi0005_0277	-3190.46	-3196.36	11.7924	0.000594717	Major facilitator superfamily (1026) ;mRNA; r:5165452-5172940
Esi0011_0154	-5406.79	-5409.4	5.22603	0.0222512	SHQ1 protein (1269) ;mRNA; r:2441351-2456241
Esi0184_0003	-2971.63	-2978.45	13.6358	0.00022191	GPA1, alpha subunit of a heterotrimeric G protein (355) ;mRNA; f:3368137-3375887
Esi0144_0067	-3036.67	-3039.5	5.65432	0.0174124	conserved unknown protein (349) ;mRNA; f:1759309-1765818
Esi0262_0002	-2362.86	-2365.08	4.45451	0.0348092	conserved unknown protein (509) ;mRNA; r:3430041-3442263
Esi0446_0017	-3791.55	-3789.28	-4.5384	0.0331426	Nug1, nuclear ribosome-associated GTPase (632) ;mRNA; f:8864184-8876337
Esi0043_0040	-1873.06	-1877.21	8.29818	0.00396848	Ribosomal protein L7Ae/L8/Nhp2 family (257) ;mRNA; r:5218272-5222692
Esi0002_0327	-4953.19	-4957.95	9.52231	0.00202989	transketolase (730) ;mRNA; f:5462097-5469275
Esi0080_0023	-2969.14	-2971.67	5.05201	0.0245974	BRCT domain (1553) ;mRNA; r:3754624-3766374
Esi0062_0008	-2374.12	-2376.2	4.14498	0.0417581	60S ribosomal protein L5 (327) ;mRNA; r:4023644-4030344
Esi0000_0564	-4117.61	-4120.19	5.16296	0.0230735	n/a (1004) ;mRNA; r:2873963-2879854
Esi0000_0293	-27991.2	-27999.5	16.4826	4.91e-05	Vacuolar protein sorting-associated protein 13 (3010) ;mRNA; f:4401377-4434530
Esi0391_0007	-2790.93	-2793.02	4.18358	0.0408174	Rubisco LSMT, substrate-binding domain (566) ;mRNA; r:6792258-6801983
Esi0075_0055	-11366	-11369.7	7.38298	0.0065844	Histone deacetylase domain (1913) ;mRNA; f:8385529-8412690
Esi0379_0011	-3747.64	-3751.85	8.42544	0.00370006	Amino acid transporter, transmembrane (615) ;mRNA; f:4039507-4049263
Esi0141_0018	-1864.51	-1867.88	6.73061	0.00947723	GOLD (289) ;mRNA; f:1077337-1081888
Esi0159_0010	-2304.63	-2308.97	8.66845	0.00323767	Protein of unknown function DUF2358 (252) ;mRNA; f:6756148-6761007
Esi0264_0026	-1807.65	-1810	4.70334	0.0301041	conserved unknown protein (195) ;mRNA; f:2858884-2862479
Esi0297_0006	-3228.8	-3231.24	4.87533	0.0272432	Myo-inositol dehydrogenase myo-inositol dehydrogenase (469) ;mRNA; r:5289631-5300377
Esi0065_0112	-6285.36	-6288.33	5.9535	0.0146881	Hypothetical leucine rich repeat calcium binding protein (1870) ;mRNA; r:1095785-1119163
Esi0077_0111	-3620.01	-3622.05	4.08119	0.0433632	Protein kinase domain (472) ;mRNA; r:2330001-2343118
Esi0195_0022	-5658.41	-5662.34	7.86917	0.00502846	CTP synthase (685) ;mRNA; r:867514-877485
Esi0007_0232	-2971.8	-2975.91	8.2315	0.00411694	Proteasome component (PCI) domain (416) ;mRNA; r:2619232-2630267
Esi0028_0040	-2168.74	-2173.09	8.68945	0.00320056	Oxa1 or Cox18/Oxa2 homolog, mitochondrial integral inner membrane protein (510) ;mRNA;
Esi0055_0024	-5201.23	-5204.99	7.51817	0.00610796	mitochondrial helicase twinkle (635) ;mRNA; f:1771841-1777162
Esi0479_0013	-4186.21	-4188.22	4.02701	0.0447772	Autophagy-related protein 4 (532) ;mRNA; r:1640938-1645922
Esi0002_0059	-3773.72	-3776.2	4.9537	0.026035	cryptochrome 3 (550) ;mRNA; r:6930414-6935670
Esi0038_0055	-3004.9	-3008.32	6.84161	0.00890584	creatine kinase (390) ;mRNA; r:1989804-1992030
Esi0238_0012	-2966.4	-2963.95	-4.91319	0.0266524	violaxanthin de-epoxidase-like protein of unknown function (556) ;mRNA; r:3462238-3469709
Esi0392_0016	-4423.02	-4425.45	4.84737	0.0276883	Bifunctional dethiobiotin synthetase/7,8-diamino-pelargonic acid aminotransferase (851) ;mRNA; f:4995012-5010548
Esi0283_0033	-3678.14	-3685.79	15.3022	9.1607e-05	Peptidase M18 (455) ;mRNA; f:2806044-2815233
Esi0023_0149	-7405.13	-7408.93	7.59818	0.00584271	Snu114, GTPase of the U5 snRNP particle (985) ;mRNA; f:2174737-2190640
Esi0020_0139	-5186.73	-5189.23	4.99623	0.0254026	conserved unknown protein (599) ;mRNA; r:967574-973782
Esi0195_0023	-2114.29	-2118.03	7.47238	0.00626527	conserved unknown protein (201) ;mRNA; f:878480-883389
Esi0089_0031	-2175.78	-2177.81	4.05959	0.0439212	RNA-polymerase II-associated protein 3-like, C-terminal domain (770) ;mRNA; r:2716138-2722718
Esi0065_0087	-1408.95	-1411.18	4.46907	0.0345138	Nucleotide-binding alpha-beta plait domain (468) ;mRNA; f:937633-946315
Esi0031_0092	-2535.39	-2529.33	-12.1141	0.000500429	G-protein beta WD-40 repeat (824) ;mRNA; r:5835355-5844905
Esi0208_0035	-4725.44	-4729.36	7.83342	0.00512891	Intraflagellar transport particle protein (704) ;mRNA; f:817840-825376
Esi0094_0009	-15330	-15334.8	9.48936	0.00206667	C2 domain (8826) ;mRNA; f:2695025-2768212
Esi0030_0140	-3756.01	-3758.89	5.75295	0.016461	Inositol polyphosphate kinase (479) ;mRNA; r:3473742-3480696
Esi0100_0065	-3552.49	-3556.13	7.27271	0.00700103	conserved unknown protein (481) ;mRNA; f:4973321-4983336
Esi0082_0088	-1973.34	-1977.54	8.41488	0.00372162	PDZ domain (219) ;mRNA; r:6202801-6206616
Esi0070_0016	-7542.18	-7546.58	8.81	0.00299584	hemolysin-type calcium-binding region (831) ;mRNA; f:4500193-4504695
Esi0004_0257	-2966.46	-2969.33	5.74861	0.0165017	Inositol-tetrakisphosphate 1-kinase (458) ;mRNA; r:4738598-4747135
Esi0215_0011	-2391.03	-2394.84	7.61781	0.00577945	Nucleotide-binding alpha-beta plait domain (517) ;mRNA; r:65028-73069
Esi0092_0074	-2536.7	-2539.9	6.40296	0.011393	Cleavage/polyadenylation specificity factor, A subunit, C-terminal (256) ;mRNA; f:4834602-4838164
Esi0059_0033	-6427.07	-6432.05	9.94827	0.00161001	CBS domain (667) ;mRNA; r:6189763-6203985
Esi0016_0114	-2038.04	-2040.25	4.42912	0.0353308	Phosphoglycerate dehydrogenase / Phosphoserine aminotransferase (1010) ;mRNA; r:722814-745557
Esi0029_0055	-976.402	-979.373	5.94123	0.0147907	FKBP-type peptidyl-prolyl cis-trans isomerase 2 (219) ;mRNA; r:296147-299378
Esi0044_0064	-8993.7	-8997.93	8.45994	0.00363054	AAA+ ATPase domain (1194) ;mRNA; r:4322259-4335513
Esi0152_0030	-2024.93	-2027.37	4.89599	0.0269192	Uracil-DNA glycosylase-like (281) ;mRNA; f:7219890-7223655
Esi0166_0044	-2514.38	-2518.44	8.10726	0.00440884	RNA pseudouridylate synthase domain containing 1 (484) ;mRNA; f:3713426-3718535
Esi0026_0040	-2517.89	-2520.77	5.77154	0.0162878	DHS-like NAD/FAD-binding domain (371) ;mRNA; r:2315369-2321401
Esi0071_0057	-4089.83	-4097.27	14.8779	0.000114698	Biotin/lipoate A/B protein ligase (416) ;mRNA; f:4980655-4984080
Esi0099_0103	-3136.18	-3139.58	6.79872	0.00912235	Beta-lactamase-like (712) ;mRNA; f:4264865-4268903
Esi0023_0162	-3664.47	-3667.14	5.34007	0.0208406	TCP-1-like chaperonin intermediate domain (528) ;mRNA; f:2256476-2268472
Esi0141_0009	-4812.69	-4815.11	4.83404	0.0279032	divalent metal transporter (629) ;mRNA; f:1034107-1040885
Esi0138_0011	-2951.92	-2955.7	7.54822	0.00600693	Brix domain (352) ;mRNA; r:626089-631837
Esi0117_0017	-7965.98	-7970	8.05146	0.0045467	Early transcription elongation factor of RNA pol II, NGN section (1089)
Esi0085_0098	-2853.03	-2854.96	3.8583	0.0495005	WD40 repeat (306) ;mRNA; f:155011-157544
Esi0013_0077	-1863.18	-1865.53	4.70144	0.0301373	Dolichol kinase (1045) ;mRNA; f:1548233-1559191
Esi0321_0010	-3810.25	-3814.33	8.1474	0.00431229	HSP20-like chaperone (426) ;mRNA; f:3699700-3701835
Esi0002_0121	-1173.89	-1176.06	4.34615	0.0370927	Chorismate Mutase (397) ;mRNA; r:6597341-6599804
Esi0046_0015	-1294.15	-1296.28	4.27353	0.0387105	conserved unknown protein (156) ;mRNA; r:4194999-4195466
Esi0002_0304	-3927.43	-3930.15	5.42887	0.0198064	Poly(A) polymerase, RNA-binding domain (496) ;mRNA; r:5574175-5586179
Esi0002_0209	-1827.1	-1829.37	4.5428	0.0330575	Prolyl 4-hydroxylase, alpha subunit (347) ;mRNA; r:6098898-6101283
Esi0014_0012	-11143	-11158.1	30.1716	4e-08	DEAD box helicase (1229) ;mRNA; f:6247580-6253490
Esi0283_0022	-3778.16	-3781.54	6.74669	0.00939216	Methionyl-tRNA synthetase (614) ;mRNA; f:2747359-2755373
Esi0062_0005	-4129.16	-4132.98	7.63559	0.00572277	Soluble NSF Attachment Protein (SNAP) Receptor (SNARE) (488) ;mRNA; f:4066754-4071540
Esi0122_0010	-3160.76	-3165.34	9.17354	0.00245539	conserved unknown protein (330) ;mRNA; f:48507-51426
Esi0086_0084	-5228.78	-5232.52	7.47679	0.00624993	MATE efflux family protein (592) ;mRNA; f:7530829-7538059
Esi0189_0001	-1684.16	-1686.41	4.51216	0.0336548	Six-bladed beta-propeller, TolB-like (173) ;mRNA; f:4279361-4284093
Esi0134_0072	-4557.1	-4560.02	5.84445	0.0156263	Sec1-like protein (567) ;mRNA; f:6386037-6389906
Esi0101_0083	-4636.79	-4639.41	5.23204	0.0221745	conserved unknown protein (732) ;mRNA; f:1053687-1066537
Esi0031_0054	-3330.15	-3332.89	5.47793	0.0192581	CWC16 protein (447) ;mRNA; f:5630342-5635264
Esi0208_0050	-3177.61	-3180.12	5.02684	0.0249574	TPR domain-containing protein (439) ;mRNA; r:912057-920162
Esi0117_0044	-6572.22	-6578.04	11.6412	0.000645076	Bifunctional glycosyltransferase, family GT74 / family GT2 (897) ;mRNA; r:3514088-3519989
Esi0586_0004	-7962.33	-7964.65	4.64869	0.0310772	expressed unknown protein (940) ;mRNA; f:12826310-12831995
Esi0063_0098	-5244.52	-5241.6	-5.84067	0.0156599	DnaJ-like/ Sec63 translocase subunit (624) ;mRNA; r:6327746-6337770
Esi0145_0068	-6390.4	-6393.52	6.23208	0.0125456	Ca2+-ATPase (1103) ;mRNA; r:3726519-3744659
Esi0028_0154	-4921.46	-4926.93	10.9526	0.000934735	Sulfate transporter N-terminal domain with GLY motif (721) ;mRNA; r:5849990-5855382
Esi0010_0009	-5408.76	-5411.4	5.26506	0.0217577	conserved unknown protein (1404) ;mRNA; f:3663672-3679191
Esi0063_0095	-5511.96	-5518.61	13.3113	0.000263804	P-loop containing nucleoside triphosphate hydrolase (736) ;mRNA; r:6310486-6319920
Esi0010_0123	-9678.08	-9681.22	6.28332	0.0121879	Vacuolar protein sorting protein 11, C-terminal (1126) ;mRNA; r:4315161-4329390
Esi0137_0087	-2779.2	-2781.57	4.72362	0.0297511	Peroxisomal biogenesis factor 11 (261) ;mRNA; r:1260234-1263332
Esi0411_0015	-5873.94	-5877.71	7.53963	0.00603564	PEF4, plastid translation elongation factor EF4 (LepA) (716) ;mRNA; r:4928075-4941471
Esi0003_0087	-5736.61	-5740.19	7.15354	0.00748163	heat shock protein Hsp90 (778) ;mRNA; r:2069707-2079802
Esi0131_0047	-2431.61	-2437.02	10.8129	0.00100795	Nurf-55 (254) ;mRNA; r:5538017-5541699
Esi0023_0041	-3252.6	-3254.62	4.04414	0.0443251	conserved unknown protein (622) ;mRNA; f:1608529-1616934
Esi0282_0014	-2837.11	-2842.89	11.5493	0.000677752	NADH dehydrogenase (ubiquinone) (377) ;mRNA; f:7338894-7344090
Esi0141_0073	-5381.44	-5391.26	19.6322	9.387e-06	carbohydrate kinase (693) ;mRNA; r:1366550-1371137
Esi0143_0027	-5694.63	-5697.35	5.43605	0.0197252	Leukotriene-A(4) hydrolase (728) ;mRNA; r:7549824-7561267
Esi0185_0039	-2893.72	-2896.3	5.15271	0.0232101	Nucleotide-binding alpha-beta plait domain (352) ;mRNA; f:2567022-2569995
Esi0003_0072	-3844.06	-3846.23	4.33792	0.0372724	Short-chain dehydrogenase/reductase SDR (409) ;mRNA; f:1992367-1997852
Esi0029_0129	-14472.9	-14477.6	9.42942	0.00213532	Voltage Gated Calcium/Sodium Channel subunit alpha. (1987) ;mRNA; f:772232-787246
Esi0228_0037	-2797.85	-2799.88	4.05339	0.0440826	Mg2+ transporter protein, CorA-like/Zinc transport protein ZntB (519) ;mRNA; r:618763-627973
Esi0301_0020	-6727.71	-6732.57	9.71911	0.00182362	Protein-tyrosine phosphatase-like (886) ;mRNA; f:1292081-1303021
Esi0085_0103	-658.408	-660.583	4.35013	0.0370062	Acyl carrier protein (144) ;mRNA; f:124890-127848
Esi0179_0062	-7353.92	-7358.39	8.94135	0.00278787	Patatin/Phospholipase A2-related (1354) ;mRNA; r:1743905-1761830
Esi0074_0093	-10932.9	-10923.5	-18.7578	1.4842e-05	expressed unknown protein (1345) ;mRNA; f:2562947-2578679
Esi0019_0171	-2189.8	-2192.94	6.28822	0.0121543	DNA-directed RNA polymerase III subunit RPC4 (518) ;mRNA; r:1469840-1480728
Esi0005_0197	-1708.77	-1712.38	7.23611	0.00714518	conserved unknown protein (277) ;mRNA; f:5596149-5600274
Esi0016_0102	-4143.24	-4147.38	8.27096	0.00402843	Methyltransferase domain (715) ;mRNA; r:808717-825994
Esi0086_0101	-26726.9	-26739.2	24.4413	7.66e-07	PDZ domain (3192) ;mRNA; r:7651000-7671669
Esi0320_0024	-7251.61	-7255.22	7.21431	0.00723244	Peptidase S59, nucleoporin (2054) ;mRNA; r:4289464-4302970
Esi0245_0016	-2706.99	-2709.55	5.13665	0.0234258	expressed unknown protein (455) ;mRNA; f:3798981-3803173
Esi0046_0121	-3158.43	-3161.95	7.03791	0.00798021	WD40 repeat (485) ;mRNA; f:3606005-3611169
Esi0206_0006	-3681.66	-3689.22	15.1233	0.000100711	prolyl 4-hydroxylase alpha-1 subunit precursor-like protein (452) ;mRNA; f:3164617-3173903
Esi0109_0017	-11649	-11645.1	-7.79552	0.00523759	ABC transporter-like (1296) ;mRNA; f:4637962-4656067
Esi0279_0006	-9568.17	-9570.8	5.26504	0.021758	Methionine synthase (1225) ;mRNA; r:628492-650173
Esi0037_0049	-2433.99	-2436.37	4.75904	0.0291448	conserved unknown protein (249) ;mRNA; f:5309273-5314054
Esi0504_0004	-7197.15	-7195.17	-3.96047	0.0465807	Chromatin assembly factor 1 subunit A (1649) ;mRNA; r:3867303-3882677
Esi0021_0044	-1783.18	-1790.67	14.9737	0.000109023	expressed unknown protein (285) ;mRNA; f:4064320-4069615
Esi0000_0204	-8998.6	-9000.92	4.63233	0.0313749	WD40 repeat (1127) ;mRNA; f:4917503-4931013
Esi0025_0075	-2612.98	-2615.47	4.98727	0.0255344	RmlC-like jelly roll fold (378) ;mRNA; f:2026208-2034012
Esi0366_0013	-6826.14	-6828.11	3.93798	0.0472074	Bromodomain (1015) ;mRNA; f:1277802-1288800
Esi0081_0075	-2516.24	-2514.11	-4.25598	0.0391125	SUN domain (265) ;mRNA; f:5323491-5325592
Esi0287_0021	-4891.92	-4898.95	14.0544	0.000177601	Valine--tRNA ligase (1037) ;mRNA; r:4640795-4660342
Esi0025_0052	-3346.52	-3350.67	8.28706	0.00399285	eukaryotic translation initiation factor 2B family protein / eIF-2B family protein
Esi0378_0007	-7447.86	-7450.45	5.19472	0.0226556	Eukaryotic translation initiation factor 3 subunit a (subunit 10) (1119) ;mRNA;
Esi0175_0023	-8124.54	-8127.93	6.77904	0.00922343	Zinc finger, RING/FYVE/PHD-type (1595) ;mRNA; f:6046224-6056383
Esi0178_0021	-2907.57	-2911.69	8.25213	0.00407041	TspO/MBR-related protein (297) ;mRNA; r:177708-182466
Esi0000_0552	-3350.56	-3352.82	4.52305	0.0334412	CRAL-TRIO domain (1135) ;mRNA; r:2926805-2931528
Esi0226_0038	-2872.6	-2875.65	6.10531	0.0134776	S-adenosylmethionine-dependent methyltransferase (505) ;mRNA; r:6188201-6193105
Esi0022_0103	-2324.15	-2329.84	11.3754	0.000744234	GDP dissociation inhibitor (863) ;mRNA; f:3660876-3666308
Esi0003_0098	-2071.07	-2073.88	5.61584	0.0177988	Proliferating cell nuclear antigen, PCNA, C-terminal (261) ;mRNA; f:2136287-2140055
Esi0213_0051	-7199.41	-7204.65	10.4733	0.00121113	tesmin-like, animal TCX proteins are associated with development of both male
Esi0063_0125	-2297.35	-2294.61	-5.48976	0.0191281	ATPase, F1 complex, gamma subunit (306) ;mRNA; r:6498205-6503440
Esi0032_0046	-1666.38	-1668.37	3.9906	0.0457548	RNA recognition motif domain, eukaryote (636) ;mRNA; f:4010820-4017130
Esi0033_0059	-2880.14	-2883.6	6.91412	0.00855177	Plastid lipid-associated protein/fibrillin conserved domain (355) ;mRNA; f:1767639-1775327
Esi0017_0113	-2471.21	-2477.2	11.9859	0.000536035	eukaryotic initiation factor 4B (569) ;mRNA; f:799068-807828
Esi0002_0211	-2433.82	-2436.32	4.99753	0.0253835	3-ketoacyl-(acyl-carrier-protein) reductase, 3-oxoacyl-[acyl-carrier-protein] reductase. (293) ;mRNA; r:6081663-6086884
Esi0238_0025	-3646.72	-3649.29	5.13358	0.0234673	S-adenosyl-L-methionine-dependent methyltransferase (457) ;mRNA; f:3375044-3383970
Esi0032_0107	-4267.54	-4270.59	6.09703	0.0135409	ApaG domain (448) ;mRNA; f:4399143-4406501
Esi0165_0035	-4469.32	-4473.9	9.16914	0.0024613	ATPase, F1 complex alpha/beta subunit, N-terminal domain (621) ;mRNA; f:2005532-2017120
Esi0278_0008	-2438.43	-2442.87	8.88544	0.00287454	Leo1-like protein (330) ;mRNA; r:4620866-4632384
Esi0162_0016	-2587.23	-2584.64	-5.18349	0.0228025	P-loop containing nucleoside triphosphate hydrolase (403) ;mRNA; f:179453-187403
Esi0000_0597	-6135.44	-6137.72	4.56024	0.0327225	Zinc finger, RING/FYVE/PHD-type (1309) ;mRNA; r:2676925-2693000
Esi0119_0028	-3255.93	-3259.59	7.30702	0.00686856	eukaryotic peptide chain release factor 1 (442) ;mRNA; r:1290546-1299017
Esi0381_0015	-5948.47	-5952.25	7.56707	0.00594444	EF2, translation elongation factor 2 (882) ;mRNA; r:1147582-1156094
Esi0036_0155	-8979.25	-8987.77	17.0379	3.6641e-05	Helicase, C-terminal (991) ;mRNA; r:2259035-2278056
Esi0000_0238	-2235.17	-2239.95	9.56025	0.00198836	conserved unknown protein (311) ;mRNA; f:4764867-4777436
Esi0002_0216	-3171.39	-3173.37	3.96174	0.0465455	conserved unknown protein (384) ;mRNA; r:6053596-6055895
Esi0200_0021	-4693.62	-4690.27	-6.69654	0.00966004	Cwf19-like protein, C-terminal domain-2 (1175) ;mRNA; r:3396742-3412398
Esi0139_0055	-2188.26	-2190.86	5.18871	0.022734	START-like domain (446) ;mRNA; f:2805935-2815459
Esi0203_0035	-3302.31	-3304.95	5.28205	0.0215463	Heat shock protein 40 (431) ;mRNA; f:7626490-7632020
Esi0228_0035	-7742.75	-7745.23	4.94153	0.0262189	Beta-lactamase-like (904) ;mRNA; r:604601-609071
Esi0000_0402	-9080.17	-9078.2	-3.92973	0.0474395	Timeless related protein (1046) ;mRNA; r:3723155-3731781
Esi0051_0024	-13415.8	-13419.4	7.30334	0.00688267	MORN motif (1662) ;mRNA; f:4806475-4832965
Esi0117_0020	-4010.84	-4018.53	15.3745	8.817e-05	T-complex protein, epsilon subunit (537) ;mRNA; f:3383356-3393239
Esi0087_0020	-16518.2	-16523	9.71132	0.00183136	Nucleotidyl transferase domain (2093) ;mRNA; f:1490998-1505349
Esi0069_0076	-4314.42	-4316.41	3.97709	0.0461232	expressed unknown protein (479) ;mRNA; f:494369-498555
Esi0378_0011	-6016.94	-6020.05	6.22514	0.0125949	Flavin monooxygenase-like (698) ;mRNA; r:4152141-4158810
Esi0108_0072	-1433.29	-1435.66	4.74582	0.0293696	S-adenosyl-L-methionine-dependent methyltransferase (398) ;mRNA; f:2558105-2560780
Esi0022_0171	-21743.2	-21739.4	-7.52468	0.00608592	Rab-GTPase-TBC domain (2403) ;mRNA; r:3246943-3262594
Esi0053_0045	-5524.15	-5526.11	3.92692	0.047519	Dihydroxyacetone/glycerone kinase (612) ;mRNA; r:2041290-2050928
Esi0082_0075	-8633.7	-8638.45	9.50657	0.00204737	Protein kinase-like domain (2450) ;mRNA; f:6105780-6129396
Esi0062_0088	-4437.38	-4444.16	13.5496	0.000232339	Histone deacetylase domain (942) ;mRNA; f:3593112-3610887
Esi0116_0046	-5571.92	-5573.85	3.86518	0.0492979	hypothetical protein (3110) ;mRNA; r:2157913-2173608
Esi0279_0018	-3372.54	-3374.84	4.58824	0.0321921	Vacuolar membrane-associated protein Iml1 (2328) ;mRNA; f:684338-705817
Esi0031_0041	-4289.33	-4292.86	7.062	0.00787361	NOSIC (536) ;mRNA; f:5543815-5553145
Esi0060_0015	-8778.05	-8780.53	4.97001	0.0257905	Type I phosphodiesterase/nucleotide pyrophosphatase/phosphate transferase (1398) ;mRNA; f:2120690-2131945
Esi0168_0073	-1681.45	-1683.93	4.9675	0.025828	conserved unknown protein (240) ;mRNA; r:1682238-1684917
Esi0066_0079	-4183.75	-4185.99	4.48958	0.034102	U4/U6-associated splicing factor PRP4 (729) ;mRNA; r:4575321-4583366
Esi0040_0074	-7824.95	-7822.95	-3.99188	0.0457199	similar to 3-phosphoadenosine 5-phosphosulfate synthase 2 isoform 2 (1110) ;mRNA; f:1072361-1090037
Esi0014_0168	-5137.17	-5139.99	5.64988	0.0174566	Acetyl-coenzyme A synthetase (689) ;mRNA; f:7064727-7074652
Esi0170_0044	-2974.91	-2977.77	5.72887	0.0166882	conserved unknown protein (397) ;mRNA; f:837466-844673
Esi0013_0129	-6482.85	-6485.21	4.70898	0.0300054	Bestrophin/UPF0187 (649) ;mRNA; r:1849471-1853413
Esi0016_0091	-2839.59	-2843.75	8.3308	0.00389785	GNAT domain (331) ;mRNA; r:918680-922247
Esi0003_0018	-2010.91	-2014.01	6.19775	0.0127913	RNA-binding domain, S1, IF1 type (254) ;mRNA; r:1736831-1738766
Esi0028_0047	-6909.24	-6912.68	6.88881	0.00867368	DEAD box helicase (828) ;mRNA; r:5275171-5278923
Esi0020_0048	-4618.96	-4624.46	11.0134	0.000904535	2-Isopropylmalate synthase (658) ;mRNA; r:428182-440513
Esi0004_0206	-5462.89	-5467.56	9.33627	0.00224663	Zinc finger, PHD-type (743) ;mRNA; f:4433151-4445916
Esi0010_0155	-2761.64	-2763.61	3.93981	0.047156	Proline-rich protein PRCC (280) ;mRNA; r:4508675-4510610
Esi0127_0023	-12396	-12399	5.99864	0.0143169	Adenylyl cyclase class-3/4/guanylyl cyclase (1878) ;mRNA; f:94134-117225
Esi0155_0053	-1846.7	-1849.44	5.47377	0.0193039	Peroxyredoxin (206) ;mRNA; f:5891079-5896408
Esi0334_0017	-6059.52	-6065.55	12.0564	0.00051614	Mitochodrial transcription termination factor (686) ;mRNA; f:5248822-5256967
Esi0226_0021	-4899.73	-4904.72	9.99089	0.00157316	WD40/YVTN repeat-like-containing domain (487) ;mRNA; r:6275972-6282993
Esi0183_0061	-3398.96	-3401.21	4.50737	0.0337491	U3 snoRNP-associated protein Utp7 (600) ;mRNA; f:5055039-5064260
Esi0002_0013	-2068.5	-2072.18	7.35004	0.00670611	protein-L-isoaspartate (D-aspartate) O-methyltransferase (332) ;mRNA; r:7179857-7184843
Esi0072_0041	-6075.37	-6079.69	8.63607	0.00329572	Nicotinamide nucleotide transhydrogenase (883) ;mRNA; r:4285704-4302019
Esi0113_0005	-15247.7	-15251.4	7.24901	0.00709403	THO complex, subunitTHOC2, C-terminal (2368) ;mRNA; r:163706-191438
Esi0010_0050	-5704.54	-5709.46	9.8531	0.00169546	Similar to dedicator of cytokinesis (1875) ;mRNA; f:3909096-3954151
Esi0029_0131	-3439.51	-3442.46	5.90935	0.0150607	Glutamate synthase (NADH/NADPH-dependent) (453) ;mRNA; r:790451-795738
Esi0309_0028	-859.143	-868.606	18.9263	1.3586e-05	beta-hydroxyacyl-ACP dehydratase (232) ;mRNA; f:917951-920214
Esi0018_0062	-2951.44	-2966.31	29.7411	4.9e-08	Clathrin assembly complex, medium subunit (433) ;mRNA; f:4589055-4594031
Esi0216_0019	-2000.22	-2004	7.56023	0.00596705	U6 snRNA phosphodiesterase Usb1 (293) ;mRNA; f:2325227-2328223
Esi0471_0006	-2968.13	-2973.07	9.86725	0.00168246	S-adenosyl-L-methionine-dependent methyltransferase (335) ;mRNA; r:9289262-9295100
Esi0064_0085	-2244.67	-2247.75	6.16036	0.0130645	flagellar adenylate kinase (245) ;mRNA; r:2393516-2397044
Esi0167_0071	-10975.6	-10979.3	7.36073	0.00666636	Uncharacterised protein family FPL (1199) ;mRNA; f:4066917-4076561
Esi0013_0133	-1831.18	-1833.3	4.23707	0.0395504	putative decarboxylase family protein, lysine decarboxylase? (246) ;mRNA; f:1871985-1879018
Esi0193_0059	-2806.25	-2809.89	7.28247	0.00696309	Alpha/Beta hydrolase fold (284) ;mRNA; f:979386-985570
Esi0069_0046	-1584.76	-1587.96	6.39462	0.0114467	Ubiquitin activating enzyme (E1) subunit UBA3 (504) ;mRNA; r:291645-298838
Esi0110_0022	-7683.21	-7685.32	4.22425	0.0398502	Vesicle transport protein, Use1 (884) ;mRNA; f:6110401-6119792
Esi0337_0035	-2710.02	-2712.19	4.34347	0.0371511	PLP-binding barrel (315) ;mRNA; f:2702704-2706429
Esi0136_0065	-3292.04	-3295.78	7.48718	0.00621398	conserved unknown protein (428) ;mRNA; f:8010393-8013657
Esi0306_0020	-1935.29	-1933.03	-4.52644	0.0333749	YEATS (298) ;mRNA; r:6479220-6484943
Esi0044_0014	-4616.62	-4619.37	5.49832	0.0190347	kinesin-like protein (755) ;mRNA; f:4596140-4609453
Esi0314_0016	-2281.64	-2287.47	11.6595	0.000638768	HBS1, eRF3-like GTPase involved in mRNA "no-go decay" (794) ;mRNA; r:582316-589113
Esi0144_0042	-3807.24	-3809.85	5.21903	0.022341	Platelet-activating factor acetylhydrolase (586) ;mRNA; r:1876337-1884763
Esi0054_0062	-4108.04	-4105.76	-4.54646	0.0329869	Chaperone (581) ;mRNA; f:766793-776892
Esi0197_0044	-2907.32	-2910.06	5.47544	0.0192855	NAD(P)-binding domain (467) ;mRNA; r:4059083-4066609
Esi0104_0047	-5529.5	-5537.56	16.1208	5.9427e-05	Urea/Na+ high-affinity symporter (690) ;mRNA; r:3387394-3410912
Esi0015_0087	-9030.14	-9036.77	13.2529	0.000272159	Armadillo-type fold (3623) ;mRNA; r:2167073-2188371
Esi0062_0080	-7534.11	-7541.73	15.2449	9.4431e-05	EF-hand domain pair (1944) ;mRNA; r:3637616-3670424
Esi0193_0019	-4190.01	-4192.37	4.73274	0.0295937	Sec23/Sec24, helical domain (945) ;mRNA; f:779517-793176
Esi0070_0055	-4098.83	-4101.69	5.72015	0.0167713	Armadillo-type fold (894) ;mRNA; f:4316825-4339264
Esi0125_0070	-3474.99	-3478.65	7.32832	0.00678765	SET domain (402) ;mRNA; f:4603834-4607860
Esi0116_0037	-2691.4	-2693.5	4.20739	0.0402481	LanC lantibiotic synthetase component C-like 2 (611) ;mRNA; r:2232158-2246074
Esi0217_0013	-3559.79	-3563.81	8.02608	0.00461086	General transcription factor II H, polypeptide 2 (413) ;mRNA; f:3338258-3343947
Esi0133_0072	-2101.63	-2103.95	4.64476	0.0311485	HAM group protein (466) ;mRNA; r:5740903-5746948
Esi0000_0470	-5139.94	-5142.32	4.75314	0.0292448	Acyl carrier protein-like (1114) ;mRNA; r:3409551-3425504
Esi0167_0048	-6773.04	-6774.97	3.85831	0.0495002	Domain of unknown function DUF221 (1045) ;mRNA; f:3962603-3985313
Esi0049_0100	-3514.65	-3521	12.6979	0.000366058	Forkhead-associated (FHA) domain (1598) ;mRNA; r:4882091-4892775
Esi0151_0005	-3391	-3395.81	9.60765	0.00193769	phosphoglycerate kinase (445) ;mRNA; f:1076575-1081308
Esi0019_0003	-6768.58	-6771	4.84208	0.0277733	P-loop containing nucleoside triphosphate hydrolase (965) ;mRNA; f:528117-547561
Esi0053_0035	-3313.62	-3318.42	9.59188	0.0019544	cbbX protein (425) ;mRNA; f:1965848-1971087
Esi0048_0119	-6765.72	-6769.64	7.85248	0.0050751	RFT1 (835) ;mRNA; f:3345963-3350362
Esi0047_0061	-2889.14	-2896.03	13.777	0.000205843	putative serine esterase (487) ;mRNA; r:2271718-2274529
Esi0006_0131	-13941.2	-13948.8	15.2726	9.3056e-05	Rab3 GTPase-activating protein, non-catalytic subunit, distant homolog (1633) ;mRNA; r:5861717-5871036
Esi0006_0107	-4241.03	-4244.63	7.1996	0.00729198	CRAL-TRIO domain (418) ;mRNA; f:5708921-5713143
Esi0082_0007	-4814.14	-4816.3	4.3207	0.0376513	Lycopene cyclase (541) ;mRNA; f:5769822-5783463
Esi0028_0166	-2888.69	-2893.51	9.64388	0.00189984	PWI domain (283) ;mRNA; f:5897626-5902598
Esi0122_0031	-7889.92	-7901.37	22.9132	1.695e-06	Raptor (929) ;mRNA; f:135112-144247
Esi0071_0020	-1310.73	-1321	20.5368	5.85e-06	Proteasome alpha-subunit, N-terminal domain (240) ;mRNA; f:4749183-4754279
Esi0055_0091	-2873.4	-2871.36	-4.07053	0.0436375	Apyrase (414) ;mRNA; r:2223901-2232535
Esi0062_0007	-2501.15	-2503.54	4.77231	0.0289211	conserved unknown protein (467) ;mRNA; f:4030588-4038787
Esi0467_0005	-16014.7	-16019.2	8.98315	0.0027248	Target of rapamycin 1 (3332) ;mRNA; f:368334-431637
Esi0081_0057	-26470.1	-26472.5	4.93417	0.0263308	Formin-like 2 (4199) ;mRNA; f:5218838-5239519
Esi0454_0019	-3572.2	-3575.19	5.9754	0.0145068	Biopterin transport-related protein BT1 (538) ;mRNA; r:558600-568857
Esi0297_0004	-2412.73	-2417.09	8.71924	0.00314869	conserved unknown protein (290) ;mRNA; r:5309105-5312252
Esi0122_0093	-707.489	-709.559	4.14023	0.0418754	Winged helix-turn-helix DNA-binding domain (325) ;mRNA; r:413711-418373
Esi0170_0057	-2361.34	-2366.47	10.2536	0.00136415	Oxa1-like homolog, mitochondrial inner membrane insertase (412) ;mRNA; r:769136-773463
Esi0050_0080	-9244.9	-9250.18	10.5599	0.00115568	conserved unknown protein (1549) ;mRNA; r:5804425-5813887
Esi0054_0133	-1676.6	-1678.68	4.1617	0.0413478	plastid thioredoxin M (227) ;mRNA; f:412294-416599
Esi0500_0010	-2109.45	-2111.47	4.0381	0.0444839	Light harvesting complex protein (237) ;mRNA; r:5547495-5551889
Esi0102_0035	-8131.26	-8129.33	-3.85576	0.0495756	aspartate kinase/homoserine dehydrogenase (946) ;mRNA; r:886191-901812
Esi0090_0053	-2676.25	-2678.83	5.17294	0.0229413	Bromodomain (415) ;mRNA; r:3643758-3647530
Esi0342_0034	-2391.12	-2395.07	7.89472	0.00495793	ankyrin repeat protein (638) ;mRNA; f:3590873-3594486
Esi0099_0034	-3225.04	-3227.49	4.88793	0.0270452	WD40 repeat (450) ;mRNA; r:3911068-3919720
Esi0035_0124	-4709.29	-4714.44	10.2861	0.00134033	Phosphorylated CTD interacting factor 1, WW domain (772) ;mRNA; f:3080660-3088092
Esi0479_0020	-2435.49	-2438.57	6.16329	0.0130428	EF-hand domain pair (346) ;mRNA; r:1667955-1669791
Esi0309_0016	-7556.39	-7559.22	5.64412	0.017514	p-Aminobenzoate Synthase (C-terminal region) p-Aminobenzoate Synthase (N-terminal region) (1165) ;mRNA; r:866755-871868
Esi0234_0011	-4508.28	-4510.36	4.14525	0.0417516	RHD3b, RHD3/Sey1 family GTPase involved in the ER-to-Golgi traffic (566) ;mRNA;
Esi0028_0027	-7466.08	-7468.67	5.1742	0.0229247	Rad4 beta-hairpin domain 2 (1043) ;mRNA; f:5109287-5118890
Esi0516_0002	-4152.08	-4155.36	6.55679	0.0104485	Programmed cell death protein 2, C-terminal (553) ;mRNA; r:377308-380819
Esi0070_0111	-3126.7	-3129.17	4.94868	0.0261106	conserved unknown protein (304) ;mRNA; r:4049412-4053090
Esi0048_0061	-14314.5	-14321.2	13.4616	0.00024349	Zinc finger, N-recognin (2759) ;mRNA; r:2947035-2975742
Esi0158_0040	-4267.34	-4269.48	4.28233	0.0385106	Amine oxidase (562) ;mRNA; f:4407514-4419406
Esi0203_0046	-2321.26	-2323.96	5.40888	0.0200346	5-formyltetrahydrofolate cyclo-ligase (257) ;mRNA; r:7693622-7698194
Esi0293_0017	-3745.28	-3747.72	4.87796	0.0272017	conserved unknown protein (701) ;mRNA; r:2357535-2379923
Esi0035_0077	-4264.44	-4266.75	4.62946	0.0314274	Protein of unknown function DUF544 (508) ;mRNA; f:2794342-2807449
Esi0165_0052	-7516.34	-7521.31	9.94805	0.0016102	P-loop containing nucleoside triphosphate hydrolase (1171) ;mRNA; r:1917808-1935187
Esi0279_0027	-1996.14	-1998.24	4.19444	0.0405568	AMMECR1 domain (241) ;mRNA; r:760892-764092
Esi0153_0013	-5459.7	-5463.65	7.9109	0.00491378	P-loop containing nucleoside triphosphate hydrolase (5533) ;mRNA; f:8969221-9036075
Esi0252_0005	-2299.95	-2302.92	5.9384	0.0148145	Phosphoribosyltransferase-like (462) ;mRNA; r:6318961-6328583
Esi0335_0013	-2572.71	-2577.09	8.75526	0.0030871	Repressor of RNA polymerase III transcription Maf1 (291) ;mRNA; f:2205435-2210548
Esi0100_0070	-2634.49	-2636.7	4.42202	0.0354779	all0748 (324) ;mRNA; f:4925964-4932174
Esi0006_0045	-5143.47	-5147.5	8.06114	0.00452246	S-adenosyl-L-methionine-dependent methyltransferase (622) ;mRNA; f:5349459-5355488
Esi0101_0029	-6944.06	-6951.67	15.2242	9.5472e-05	conserved unknown protein (694) ;mRNA; f:1343417-1348923
Esi0002_0034	-2555.38	-2557.33	3.88948	0.0485895	filamentous temperature sensitive Z (481) ;mRNA; f:7044345-7052742
Esi0202_0039	-2484.17	-2487.29	6.25154	0.0124085	Glycosyl hydrolase, five-bladed beta-propellor domain (605) ;mRNA; f:5504216-5517465
Esi0023_0115	-1709.23	-1713.28	8.10322	0.00441866	Ribosomal protein L7/L12, C-terminal/adaptor protein ClpS-like (201) ;mRNA; r:1994472-1999752
Esi0144_0073	-8152.8	-8155.67	5.74324	0.0165523	expressed unknown protein (879) ;mRNA; f:1706718-1727093
Esi0007_0142	-5721.19	-5723.15	3.92373	0.047609	Microtubule-associated protein, MAP65/Ase1/PRC1 (596) ;mRNA; f:2125285-2130734
Esi0080_0033	-4205.79	-4208.85	6.12366	0.0133384	ENTH/VHS (559) ;mRNA; r:3689970-3697704
Esi0036_0043	-3970.74	-3975.74	10.0037	0.00156227	Phenylalanine--tRNA ligase (506) ;mRNA; f:1597000-1605016
Esi0187_0010	-6338.56	-6344.04	10.9775	0.000922257	P-loop containing nucleoside triphosphate hydrolase (981) ;mRNA; r:679128-692633
Esi0013_0093	-5301.79	-5306.44	9.29714	0.00229512	Tyrosyl-DNA phosphodiesterase (608) ;mRNA; f:1613294-1624112
Esi0085_0010	-1607.04	-1610.22	6.36187	0.0116598	imm downregulated 23 (193) ;mRNA; f:527818-531810
Esi0062_0012	-5004.77	-5007.07	4.60167	0.0319409	Prolyl 4-hydroxylase, alpha subunit (1155) ;mRNA; r:4004124-4012107
Esi0025_0070	-1328.83	-1330.89	4.12264	0.042313	Contains domains for prephenate dehydrogenase and nucleoside-diphosphate-sugar epimerases (383) ;mRNA; f:1985599-1990170
Esi0015_0160	-3818.87	-3820.87	3.98402	0.0459339	Heat shock protein 40 (380) ;mRNA; r:1733952-1746411
Esi0474_0016	-1569.57	-1573.56	7.97619	0.00473965	conserved unknown protein (188) ;mRNA; f:1203384-1210302
Esi0144_0003	-8111.78	-8113.75	3.93519	0.0472857	conserved unknown protein (867) ;mRNA; r:2097116-2100787
Esi0326_0032	-2631.83	-2635.02	6.38444	0.0115125	dihydrolipoamide acetyltransferase (600) ;mRNA; f:101673-111426
Esi0211_0009	-2401.77	-2408.4	13.2632	0.000270665	sperm flagellar energy carrier protein (306) ;mRNA; r:4949403-4953769
Esi0018_0028	-9931.95	-9934.08	4.26249	0.0389628	5-oxoprolinase (ATP-hydrolysing) (1318) ;mRNA; r:4765823-4790904
Esi0192_0021	-17067.8	-17073.7	11.7065	0.000622825	BEACH domain (2872) ;mRNA; f:4208535-4225994
Esi0197_0038	-8569.22	-8574.91	11.3924	0.000737466	T-complex 11 (1140) ;mRNA; f:4032494-4042234
Esi0387_0015	-2512.87	-2515.6	5.47247	0.0193183	Bile acid:sodium symporter/arsenical resistance protein Acr3 (257) ;mRNA; f:3990233-3993934
Esi0252_0028	-7226.91	-7230.36	6.90629	0.00858931	expressed unknown protein (882) ;mRNA; f:6482133-6489983
Esi0008_0117	-10733.3	-10735.6	4.60727	0.0318367	PDZ domain (1161) ;mRNA; r:9708987-9716852
Esi0063_0052	-4088.53	-4091.17	5.28904	0.02146	acetylornithine aminotransferase (479) ;mRNA; r:6088373-6094474
Esi0196_0048	-4231.29	-4233.6	4.61469	0.0316993	DnaJ domain (569) ;mRNA; r:2297501-2305353
Esi0046_0050	-2779.88	-2773.76	-12.2495	0.000465374	HSPC140 (343) ;mRNA; r:4002016-4010524
Esi0084_0036	-1624.93	-1628.91	7.95396	0.00479822	Ribosomal protein L13e (205) ;mRNA; f:2280208-2285797
Esi0265_0025	-3368.52	-3371.49	5.93792	0.0148185	Endoribonuclease L-PSP/chorismate mutase-like (614) ;mRNA; f:922909-939829
Esi0063_0084	-3620.67	-3625.25	9.16061	0.0024728	isovaleryl-CoA dehydrogenase (442) ;mRNA; r:6269432-6276280
Esi0236_0015	-562.167	-564.315	4.29604	0.0382012	TALE homeobox domain transcription factor (631) ;mRNA; f:532272-536809
Esi0110_0037	-4155.29	-4158.49	6.40163	0.0114016	Atg6/Beclin (695) ;mRNA; f:6195753-6200246
Esi0250_0012	-5469.86	-5473.53	7.33723	0.00675407	Glutamate cysteine ligase (851) ;mRNA; f:1919303-1933000
Esi0099_0091	-3606.63	-3610.82	8.37415	0.00380596	DNA polymerase, Y-family, little finger domain (754) ;mRNA; f:4206404-4211711
Esi0101_0036	-1386.74	-1388.74	3.99059	0.045755	Transcription factor prr1 (Pombe response regulator 1) (590) ;mRNA; r:1313947-1328734
Esi0098_0012	-1176.48	-1179.84	6.70934	0.0095909	photosystem II 12 kDa extrinsic protein (159) ;mRNA; f:564498-568005

## Sheet: table S3
Table S3. List of genes under positive selection with posterior possibility>0.9 in E. siliculosus
gene ID	lnL1	lnL2	p value	annotation
Esi0026_0111	-3761.31	-3764.27	0.0149343	ATP synthase subunit alpha-like domain (523) ;mRNA; f:2744536-2753101
Esi0398_0023	-2276.7	-2278.82	0.0393657	Triosephosphate isomerase, (258) ;mRNA; f:487901-496479
Esi0015_0164	-11092.5	-11099	0.000285039	pleiotropic drug resistance transporter (1444) ;mRNA; r:1689571-1718654
Esi0127_0036	-15187.1	-15189.8	0.0199166	conserved unknown protein (3188) ;mRNA; r:153253-185484
Esi0289_0029	-8388.87	-8391.59	0.01961	postmeiotic segregation increased 2 (908) ;mRNA; f:6576062-6583848
Esi0013_0091	-2731.6	-2734.06	0.0267286	G-patch domain (305) ;mRNA; f:1607550-1609624
Esi0056_0109	-4653.02	-4655.9	0.016285	Protein of unknown function DUF974 (536) ;mRNA; f:1556769-1562440
Esi0115_0037	-2482.08	-2486.61	0.00260407	conserved unknown protein (839) ;mRNA; r:5683999-5687508
Esi0117_0013	-3791.21	-3800.03	2.6692e-05	Phosphoribosylaminoimidazole carboxylase PurE domain (443) ;mRNA; f:3326166-3332964
Esi0246_0031	-5731.45	-5734.68	0.0110755	putative glutamate/ornithine acetyltransferase (ISS) (790) ;mRNA; r:3046375-3051869
Esi0027_0087	-3389.74	-3402.14	6.38e-07	Hydroxymethylglutaryl-CoA reductase (NADPH) (762) ;mRNA; r:702481-711092
Esi0320_0011	-1852.27	-1856.45	0.00382372	3-ketoacyl-CoA thiolase (384) ;mRNA; f:4217738-4227215
Esi0018_0102	-3865.71	-3868.49	0.0184126	Renin receptor-like (404) ;mRNA; f:4345212-4349119
Esi0024_0124	-3379.21	-3381.26	0.0431624	conserved unknown protein (529) ;mRNA; r:5383361-5400605
Esi0063_0122	-3475.76	-3477.99	0.0349509	Ribosomal protein L1-like (364) ;mRNA; f:6477692-6479488
Esi0048_0062	-2532.9	-2535.31	0.0282331	Indole-3-glycerol-phosphate synthase (C-terminal region) Indole-3-glycerol-phosphate synthase (N-ter (388) ;mRNA;
Esi0012_0133	-5483.52	-5486.06	0.0243785	Pyridine nucleotide-disulphide oxidoreductase, FAD/NAD(P)-binding domain (928) ;mRNA; r:446434-454566
Esi0120_0004	-2779.99	-2783.63	0.00695979	WD40 repeat (249) ;mRNA; f:16690-22256
Esi0070_0005	-6071.73	-6075.8	0.00434913	Major facilitator superfamily (715) ;mRNA; f:4546238-4563380
Esi0170_0046	-8281.21	-8287.71	0.000309133	Peptidase C48, SUMO/Sentrin/Ubl1 (1322) ;mRNA; r:823875-835974
Esi0090_0052	-2338.62	-2342.75	0.00407495	conserved unknown protein (338) ;mRNA; f:3647904-3651451
Esi0113_0004	-3111.22	-3113.58	0.0297945	expressed unknown protein (305) ;mRNA; f:158576-161031
Esi0035_0139	-3572.4	-3575.91	0.00806231	acyltransferase (426) ;mRNA; f:3159902-3171245
Esi0038_0034	-2490.51	-2493.74	0.0109976	expressed unknown protein (265) ;mRNA; r:1847577-1851474
Esi0037_0054	-4878.23	-4880.24	0.0447935	Sulfotransferase (512) ;mRNA; r:5277894-5288125
Esi0120_0041	-9884.35	-9889.65	0.00112849	Tetratricopeptide-like helical domain (1119) ;mRNA; r:257729-273383
Esi0147_0013	-1745.42	-1750.16	0.00207114	START-like domain (1060) ;mRNA; r:2663056-2679240
Esi0189_0045	-986.574	-989.863	0.0103261	Mago nashi (148) ;mRNA; f:4474144-4475643
Esi0054_0002	-3960.53	-3963.01	0.0259196	MFS family transporter: sugar (489) ;mRNA; r:1109344-1120653
Esi0198_0012	-2952.54	-2954.84	0.0320241	conserved unknown protein (220) ;mRNA; r:2586014-2586940
Esi0342_0005	-2125.28	-2127.45	0.0373077	conserved unknown protein (249) ;mRNA; r:3440797-3443812
Esi0719_0005	-8938.48	-8940.76	0.0327336	Rhodanese-like domain (1441) ;mRNA; f:16098264-16108384
Esi0031_0031	-3968.04	-3969.99	0.0483589	LNS2, Lipin/Ned1/Smp2 (488) ;mRNA; r:5485302-5491061
Esi0063_0032	-10717.7	-10719.9	0.0370946	Magnesium chelatase subunit H, putative chloroplast precursor (1443) ;mRNA;
Esi0004_0227	-3278.82	-3282.05	0.0110982	Pseudouridine synthase, RsuA/RluB/C/D/E/F (509) ;mRNA; r:4568711-4573301
Esi0073_0048	-2664.53	-2667.68	0.0121436	DNA polymerase family X lyase domain (281) ;mRNA; f:1213650-1221002
Esi0069_0095	-5840.96	-5842.99	0.0441816	CCT domain (716) ;mRNA; r:615782-624249
Esi0018_0211	-3427.95	-3430.18	0.0346222	MutS protein homolog 1A (619) ;mRNA; f:3821469-3828634
Esi0453_0002	-3682.64	-3685.49	0.0170492	Proton-dependent oligopeptide transporter family (497) ;mRNA; f:5461107-5469816
Esi0082_0090	-3564.87	-3568.87	0.00464708	Domain of unknown function DUF1767 (735) ;mRNA; r:6212808-6217982
Esi0489_0018	-1857.24	-1861.22	0.00480231	SWIB/MDM2 domain (325) ;mRNA; r:5473110-5481154
Esi0062_0072	-2019.93	-2023.62	0.00656291	transducin family protein (730) ;mRNA; f:3702829-3711751
Esi0034_0065	-5380.04	-5382.57	0.0243466	Diphthamide biosynthesis protein 2, putative (898) ;mRNA; r:3869006-3876167
Esi0226_0001	-4324.68	-4330.52	0.000627336	Choline transporter-like (496) ;mRNA; r:6362831-6377671
Esi0073_0036	-2758.99	-2764.38	0.00103331	2-oxoglutarate dehydrogenase, E2 component (337) ;mRNA; r:1150133-1159540
Esi0000_0603	-7478.36	-7481.41	0.0136091	Vesicle coat complex COPII, subunit SEC31 (1067) ;mRNA; f:2613604-2629400
Esi0002_0327	-4954.41	-4958.57	0.00391055	transketolase (730) ;mRNA; f:5462097-5469275
Esi0115_0089	-3969.46	-3959.41	7.354e-06	Armadillo-type fold (482) ;mRNA; r:5992032-6000840
Esi0032_0106	-5656.92	-5659.32	0.0285934	conserved unknown protein (824) ;mRNA; f:4386010-4397108
Esi0065_0112	-6279.14	-6281.98	0.0172521	Hypothetical leucine rich repeat calcium binding protein (1870) ;mRNA;
Esi0119_0019	-3939.59	-3941.79	0.0360216	Protein kinase-like domain (396) ;mRNA; r:1242127-1247536
Esi0090_0064	-3009.8	-3013.99	0.00379477	ABC transporter-like (697) ;mRNA; r:3578107-3588062
Esi0121_0014	-2237.05	-2240.73	0.00667805	FYVE zinc finger (233) ;mRNA; f:1439331-1442876
Esi0019_0071	-1684.56	-1688.5	0.00504301	Glyoxalase/Bleomycin resistance protein/Dihydroxybiphenyl dioxygenase (180) ;mRNA; f:932609-935113
Esi0193_0026	-2084.77	-2087.43	0.0212079	Histidinol-phosphate transaminase (401) ;mRNA; f:812698-816055
Esi0055_0019	-5909.7	-5911.63	0.0494743	Phospholipid/glycerol acyltransferase (652) ;mRNA; r:1755233-1763996
Esi0117_0017	-7965.46	-7968.03	0.0234036	Early transcription elongation factor of RNA pol II, NGN
Esi0014_0012	-11155.1	-11163.7	3.6989e-05	DEAD box helicase (1229) ;mRNA; f:6247580-6253490
Esi0031_0054	-3329.77	-3332.89	0.0125379	CWC16 protein (447) ;mRNA; f:5630342-5635264
Esi0165_0057	-3988.54	-3992.74	0.00374098	eukaryotic translation initiation factor 2B gamma subunit (420) ;mRNA;
Esi0113_0001	-3233.84	-3236.03	0.0363558	conserved unknown protein (325) ;mRNA; f:139386-151039
Esi0003_0188	-2226.82	-2229.67	0.0168236	Major facilitator superfamily domain (345) ;mRNA; r:2639398-2643856
Esi0003_0263	-2392.04	-2395.98	0.00502523	Brix domain (289) ;mRNA; r:2942751-2956142
Esi0431_0007	-4846.14	-4853.09	0.00019265	CAAX amino terminal protease (587) ;mRNA; f:1077782-1085000
Esi0504_0004	-7192.37	-7197.15	0.0019849	Chromatin assembly factor 1 subunit A (1649) ;mRNA; r:3867303-3882677
Esi0021_0044	-1785.02	-1786.94	0.0499597	expressed unknown protein (285) ;mRNA; f:4064320-4069615
Esi0367_0023	-8758.1	-8765.25	0.00015662	Acetyl-CoA carboxylase, partial (1049) ;mRNA; r:3490370-3507598
Esi0264_0007	-5804.72	-5807.13	0.027989	Translation initiation factor SUI1 (658) ;mRNA; r:2761796-2770513
Esi0089_0116	-3514.69	-3520.8	0.000469815	hypothetical protein (682) ;mRNA; r:3116581-3127172
Esi0036_0155	-8968.32	-8974.03	0.000723236	Helicase, C-terminal (991) ;mRNA; r:2259035-2278056
Esi0120_0077	-1636.2	-1639.43	0.0110027	Trimeric LpxA-like (186) ;mRNA; r:474683-477488
Esi0063_0058	-3077.5	-3079.95	0.0266452	Histidyl-tRNA Synthetase Similar to Histidine Ammonia-Lyase (956) ;mRNA; r:6122979-6135248
Esi0097_0006	-3868.98	-3873.07	0.0042314	conserved unknown protein (469) ;mRNA; r:4802660-4817061
Esi0115_0043	-2485.93	-2489.45	0.00795724	CHloroplast inner membrane protein TIC 21 (327) ;mRNA; r:5741666-5746194
Esi0252_0029	-2401.99	-2407.25	0.00117772	Carbohydrate kinase, FGGY, N-terminal (784) ;mRNA; r:6491579-6505725
Esi0014_0190	-3938.68	-3940.95	0.0331026	DEAD box helicase (573) ;mRNA; f:7196820-7202461
Esi0226_0021	-4898.8	-4902.55	0.00617248	WD40/YVTN repeat-like-containing domain (487) ;mRNA; r:6275972-6282993
Esi0064_0059	-2258.09	-2262.07	0.00476152	RNA-binding domain, S1 (644) ;mRNA; f:2554396-2561892
Esi0072_0041	-6062.36	-6066.95	0.00245907	Nicotinamide nucleotide transhydrogenase (883) ;mRNA; r:4285704-4302019
Esi0002_0055	-5453.02	-5457.39	0.00309552	Zinc finger, UBP-type (573) ;mRNA; r:6950419-6954457
Esi0223_0020	-3154.04	-3158.31	0.00348712	Geranylgeranyl reductase (475) ;mRNA; f:3984517-3989827
Esi0115_0024	-3195.14	-3201.25	0.000475198	conserved unknown protein (316) ;mRNA; f:5621616-5623295
Esi0069_0046	-1577.39	-1580.83	0.0087054	Ubiquitin activating enzyme (E1) subunit UBA3 (504) ;mRNA; r:291645-298838
Esi0167_0009	-3825.92	-3827.89	0.0474773	Major facilitator superfamily (643) ;mRNA; r:3804643-3818899
Esi0062_0080	-7513.64	-7521.78	5.4619e-05	EF-hand domain pair (1944) ;mRNA; r:3637616-3670424
Esi0090_0061	-4482.64	-4488.72	0.00048679	Malate synthase (545) ;mRNA; f:3592302-3601085
Esi0212_0021	-2278.16	-2282.64	0.00274321	Plastid ribosomal protein S1 (458) ;mRNA; f:2747155-2751816
Esi0003_0066	-2310.16	-2312.35	0.0361725	S-adenosyl-L-methionine-dependent methyltransferase (579) ;mRNA; f:1968188-1972923
Esi0098_0077	-6674.27	-6687.81	1.95e-07	Rossmann-like alpha/beta/alpha sandwich fold (1251) ;mRNA; r:945381-957679
Esi0467_0005	-16009	-16013.6	0.00252679	Target of rapamycin 1 (3332) ;mRNA; f:368334-431637
Esi0112_0005	-2948.61	-2956.4	7.9116e-05	ferredoxin-NADP oxidoreductase (389) ;mRNA; f:1123121-1127880
Esi0050_0080	-9245.6	-9242.55	0.0135293	conserved unknown protein (1549) ;mRNA; r:5804425-5813887
Esi0479_0020	-2432.95	-2436.67	0.006349	EF-hand domain pair (346) ;mRNA; r:1667955-1669791
Esi0309_0016	-7555.72	-7559.08	0.00952944	p-Aminobenzoate Synthase (C-terminal region) p-Aminobenzoate Synthase (N-terminal region) (1165)
Esi0164_0064	-3377.19	-3383.68	0.000313624	chaperonin cpn60 (621) ;mRNA; r:4783741-4795515
Esi0070_0111	-3122.76	-3125.78	0.0139739	conserved unknown protein (304) ;mRNA; r:4049412-4053090
Esi0100_0070	-2630.61	-2634.69	0.00428663	all0748 (324) ;mRNA; f:4925964-4932174
Esi0023_0115	-1706.31	-1710.42	0.0041299	Ribosomal protein L7/L12, C-terminal/adaptor protein ClpS-like (201) ;mRNA; r:1994472-1999752
Esi0003_0341	-2639.45	-2641.83	0.0292166	Uncharacterised domain SAYSvFN (265) ;mRNA; f:3285294-3287802
Esi0144_0073	-8154.54	-8152.59	0.0487772	expressed unknown protein (879) ;mRNA; f:1706718-1727093
Esi0326_0032	-2599.15	-2602.27	0.0124458	dihydrolipoamide acetyltransferase (600) ;mRNA; f:101673-111426
Esi0211_0009	-2405.99	-2408.2	0.0352963	sperm flagellar energy carrier protein (306) ;mRNA; r:4949403-4953769
Esi0197_0038	-8567.48	-8572.21	0.00210973	T-complex 11 (1140) ;mRNA; f:4032494-4042234
Esi0387_0015	-2501.91	-2507.74	0.000634179	Bile acid:sodium symporter/arsenical resistance protein Acr3 (257) ;mRNA; f:3990233-3993934
Esi0049_0059	-11213.6	-11217.4	0.00626747	eIF-2alpha kinase GCN2 similar to Eukaryotic translation initiation factor

## Sheet: table S4
Table S4. List of genes under positive selectioin with posterior possibility>0.9 in S. japonica
gene ID	lnL1	lnL2	p value	annotation
Esi0320_0007	-7257.67	-7260.72	0.0136197	Helicase, C-terminal (1410) ;mRNA; r:4190764-4206745
Esi0037_0092	-18481.9	-18483.9	0.0479516	P-loop containing nucleoside triphosphate hydrolase (2573) ;mRNA; r:5087372-5106571
Esi0362_0023	-3019.37	-3021.91	0.0241909	Septum formation inhibitor MinC (313) ;mRNA; r:1917384-1922423
Esi0085_0036	-3767.41	-3771.23	0.00572231	Cation efflux protein (591) ;mRNA; r:391685-398642
Esi0070_0009	-5495.21	-5501.06	0.000621441	Small-subunit processome, Utp12 (1042) ;mRNA; f:4519288-4533772
Esi0052_0197	-2674.67	-2677.26	0.0228501	Nucleic acid-binding, OB-fold (330) ;mRNA; r:4102063-4109249
Esi0032_0004	-3339.75	-3343.19	0.0087074	PDZ domain (561) ;mRNA; r:3805897-3814773
Esi0099_0059	-5429.54	-5434.38	0.00185416	P-loop containing nucleoside triphosphate hydrolase (819) ;mRNA; r:4036157-4050185
Esi0155_0064	-3915.24	-3917.2	0.0475278	NADH dehydrogenase (ubiquinone) (544) ;mRNA; r:5822744-5832906
Esi0199_0035	-5206.94	-5208.9	0.0480653	Heat Shock transcription factor (1191) ;mRNA; r:1643619-1659113
Esi0068_0079	-2744.28	-2746.71	0.0274999	Casein kinase (708) ;mRNA; f:3396331-3448255
Esi0015_0069	-25495	-25504	2.1997e-05	Armadillo-like helical (3347) ;mRNA; f:2273037-2312573
Esi0087_0032	-2289.76	-2292.53	0.0185083	Cysteinyl-tRNA Synthetase (665) ;mRNA; r:1427876-1432137
Esi0000_0342	-4312.31	-4315.57	0.0106692	Nin one binding (NOB1) Zn-ribbon-like (557) ;mRNA; f:4082775-4087713
Esi0071_0031	-4279.26	-4283.77	0.00268154	Histidyl-tRNA Synthetase (C-terminal region) Histidyl-tRNA Synthetase (N-terminal region) (577) ;mRNA; f:4820323-4829704
Esi0198_0021	-6027.6	-6029.57	0.0470045	Transketolase-like, pyrimidine-binding domain (691) ;mRNA; r:2648621-2663108
Esi0018_0112	-3500.38	-3503.73	0.00972717	conserved unknown protein (304) ;mRNA; f:4287365-4290195
Esi0180_0012	-6627.29	-6629.66	0.0295267	Cyclic nucleotide-binding domain (766) ;mRNA; r:3246388-3258996
Esi0091_0058	-3442.82	-3445.08	0.0335563	S-Adenosyl homocysteine hydrolase (480) ;mRNA; r:2890291-2892981
Esi0139_0070	-4670.87	-4672.83	0.0479009	conserved unknown protein (613) ;mRNA; r:2729510-2736187
Esi0300_0018	-1710.21	-1712.67	0.0264033	Light harvesting complex protein (212) ;mRNA; f:4377571-4382718
Esi0240_0011	-2669.38	-2672.79	0.00902309	mitochondrial pyrimidine nucleotide transporter (456) ;mRNA; f:1915786-1921088
Esi0044_0001	-4046.57	-4049.06	0.0257088	Armadillo-type fold (671) ;mRNA; f:4689812-4700878
Esi0003_0133	-5026.25	-5029.45	0.0113209	C2H2 zinc finger protein (593) ;mRNA; r:2333417-2335195
Esi0257_0009	-3146.74	-3152.76	0.000520968	Peroxin-3 domain (711) ;mRNA; r:1744641-1755798
Esi0144_0063	-3580.02	-3583.09	0.0131945	HhH-GPD domain (420) ;mRNA; f:1799200-1803276
Esi0002_0151	-4387.51	-4391.44	0.00508953	similar to MGC81978 protein (469) ;mRNA; f:6449284-6453684
Esi0004_0259	-11581.6	-11586.2	0.00264306	Domain of unknown function DUF547 (1742) ;mRNA; f:4748791-4773073
Esi0100_0096	-3399.93	-3404.38	0.00284228	ubiquitin-conjugating enzyme E2-binding protein 1 (519) ;mRNA; f:4786456-4792411
Esi0228_0005	-5775.53	-5779.84	0.00331095	NatC N(alpha)-terminal acetyltransferase, Mak10 subunit (1235) ;mRNA; r:449009-460872
Esi0418_0021	-5738.8	-5743.51	0.00213447	Peptidase M16, C-terminal domain (856) ;mRNA; r:1334180-1352461
Esi0240_0024	-2633.55	-2637.11	0.00763617	glyceraldehyde 3-phosphate dehydrogenase (386) ;mRNA; f:2005542-2008955
Esi0141_0037	-1535.66	-1539.03	0.00941229	Predicted HD phosphohydrolase (238) ;mRNA; r:1176521-1179060
Esi0087_0054	-14947.6	-14951.3	0.00663671	SAC3/GANP/Nin1/mts3/eIF-3 p25 (2544) ;mRNA; r:1293851-1309085
Esi0133_0079	-4519.68	-4522.41	0.0194477	Glycyl-tRNA Synthetase (408) ;mRNA; r:5772682-5779079
Esi0226_0001	-4327.68	-4331.37	0.00655701	Choline transporter-like (496) ;mRNA; r:6362831-6377671
Esi0011_0154	-5406.79	-5409.4	0.0222512	SHQ1 protein (1269) ;mRNA; r:2441351-2456241
Esi0144_0067	-3036.67	-3039.5	0.0174124	conserved unknown protein (349) ;mRNA; f:1759309-1765818
Esi0002_0327	-4953.19	-4957.95	0.00202989	transketolase (730) ;mRNA; f:5462097-5469275
Esi0062_0008	-2374.12	-2376.2	0.0417581	60S ribosomal protein L5 (327) ;mRNA; r:4023644-4030344
Esi0000_0564	-4117.61	-4120.19	0.0230735	n/a (1004) ;mRNA; r:2873963-2879854
Esi0391_0007	-2790.93	-2793.02	0.0408174	Rubisco LSMT, substrate-binding domain (566) ;mRNA; r:6792258-6801983
Esi0264_0026	-1807.65	-1810	0.0301041	conserved unknown protein (195) ;mRNA; f:2858884-2862479
Esi0007_0232	-2971.8	-2975.91	0.00411694	Proteasome component (PCI) domain (416) ;mRNA; r:2619232-2630267
Esi0055_0024	-5201.23	-5204.99	0.00610796	mitochondrial helicase twinkle (635) ;mRNA; f:1771841-1777162
Esi0479_0013	-4186.21	-4188.22	0.0447772	Autophagy-related protein 4 (532) ;mRNA; r:1640938-1645922
Esi0023_0149	-7405.13	-7408.93	0.00584271	Snu114, GTPase of the U5 snRNP particle (985) ;mRNA; f:2174737-2190640
Esi0100_0065	-3552.49	-3556.13	0.00700103	conserved unknown protein (481) ;mRNA; f:4973321-4983336
Esi0082_0088	-1973.34	-1977.54	0.00372162	PDZ domain (219) ;mRNA; r:6202801-6206616
Esi0215_0011	-2391.03	-2394.84	0.00577945	Nucleotide-binding alpha-beta plait domain (517) ;mRNA; r:65028-73069
Esi0092_0074	-2536.7	-2539.9	0.011393	Cleavage/polyadenylation specificity factor, A subunit, C-terminal (256) ;mRNA; f:4834602-4838164
Esi0059_0033	-6427.07	-6432.05	0.00161001	CBS domain (667) ;mRNA; r:6189763-6203985
Esi0044_0064	-8993.7	-8997.93	0.00363054	AAA+ ATPase domain (1194) ;mRNA; r:4322259-4335513
Esi0152_0030	-2024.93	-2027.37	0.0269192	Uracil-DNA glycosylase-like (281) ;mRNA; f:7219890-7223655
Esi0023_0162	-3664.47	-3667.14	0.0208406	TCP-1-like chaperonin intermediate domain (528) ;mRNA; f:2256476-2268472
Esi0117_0017	-7965.98	-7970	0.0045467	Early transcription elongation factor of RNA pol II, NGN section (1089)
Esi0283_0022	-3778.16	-3781.54	0.00939216	Methionyl-tRNA synthetase (614) ;mRNA; f:2747359-2755373
Esi0208_0050	-3177.61	-3180.12	0.0249574	TPR domain-containing protein (439) ;mRNA; r:912057-920162
Esi0003_0087	-5736.61	-5740.19	0.00748163	heat shock protein Hsp90 (778) ;mRNA; r:2069707-2079802
Esi0131_0047	-2431.61	-2437.02	0.00100795	Nurf-55 (254) ;mRNA; r:5538017-5541699
Esi0023_0041	-3252.6	-3254.62	0.0443251	conserved unknown protein (622) ;mRNA; f:1608529-1616934
Esi0141_0073	-5381.44	-5391.26	9.387e-06	carbohydrate kinase (693) ;mRNA; r:1366550-1371137
Esi0003_0072	-3844.06	-3846.23	0.0372724	Short-chain dehydrogenase/reductase SDR (409) ;mRNA; f:1992367-1997852
Esi0228_0037	-2797.85	-2799.88	0.0440826	Mg2+ transporter protein, CorA-like/Zinc transport protein ZntB (519) ;mRNA; r:618763-627973
Esi0301_0020	-6727.71	-6732.57	0.00182362	Protein-tyrosine phosphatase-like (886) ;mRNA; f:1292081-1303021
Esi0016_0102	-4143.24	-4147.38	0.00402843	Methyltransferase domain (715) ;mRNA; r:808717-825994
Esi0206_0006	-3681.66	-3689.22	0.000100711	prolyl 4-hydroxylase alpha-1 subunit precursor-like protein (452) ;mRNA; f:3164617-3173903
Esi0287_0021	-4891.92	-4898.95	0.000177601	Valine--tRNA ligase (1037) ;mRNA; r:4640795-4660342
Esi0025_0052	-3346.52	-3350.67	0.00399285	eukaryotic translation initiation factor 2B family protein / eIF-2B family protein
Esi0175_0023	-8124.54	-8127.93	0.00922343	Zinc finger, RING/FYVE/PHD-type (1595) ;mRNA; f:6046224-6056383
Esi0000_0552	-3350.56	-3352.82	0.0334412	CRAL-TRIO domain (1135) ;mRNA; r:2926805-2931528
Esi0226_0038	-2872.6	-2875.65	0.0134776	S-adenosylmethionine-dependent methyltransferase (505) ;mRNA; r:6188201-6193105
Esi0003_0098	-2071.07	-2073.88	0.0177988	Proliferating cell nuclear antigen, PCNA, C-terminal (261) ;mRNA; f:2136287-2140055
Esi0213_0051	-7199.41	-7204.65	0.00121113	tesmin-like, animal TCX proteins are associated with development of both male
Esi0238_0025	-3646.72	-3649.29	0.0234673	S-adenosyl-L-methionine-dependent methyltransferase (457) ;mRNA; f:3375044-3383970
Esi0165_0035	-4469.32	-4473.9	0.0024613	ATPase, F1 complex alpha/beta subunit, N-terminal domain (621) ;mRNA; f:2005532-2017120
Esi0000_0597	-6135.44	-6137.72	0.0327225	Zinc finger, RING/FYVE/PHD-type (1309) ;mRNA; r:2676925-2693000
Esi0000_0238	-2235.17	-2239.95	0.00198836	conserved unknown protein (311) ;mRNA; f:4764867-4777436
Esi0002_0216	-3171.39	-3173.37	0.0465455	conserved unknown protein (384) ;mRNA; r:6053596-6055895
Esi0087_0020	-16518.2	-16523	0.00183136	Nucleotidyl transferase domain (2093) ;mRNA; f:1490998-1505349
Esi0108_0072	-1433.29	-1435.66	0.0293696	S-adenosyl-L-methionine-dependent methyltransferase (398) ;mRNA; f:2558105-2560780
Esi0053_0045	-5524.15	-5526.11	0.047519	Dihydroxyacetone/glycerone kinase (612) ;mRNA; r:2041290-2050928
Esi0060_0015	-8778.05	-8780.53	0.0257905	Type I phosphodiesterase/nucleotide pyrophosphatase/phosphate transferase (1398) ;mRNA; f:2120690-2131945
Esi0020_0048	-4618.96	-4624.46	0.000904535	2-Isopropylmalate synthase (658) ;mRNA; r:428182-440513
Esi0127_0023	-12396	-12399	0.0143169	Adenylyl cyclase class-3/4/guanylyl cyclase (1878) ;mRNA; f:94134-117225
Esi0155_0053	-1846.7	-1849.44	0.0193039	Peroxyredoxin (206) ;mRNA; f:5891079-5896408
Esi0334_0017	-6059.52	-6065.55	0.00051614	Mitochodrial transcription termination factor (686) ;mRNA; f:5248822-5256967
Esi0002_0013	-2068.5	-2072.18	0.00670611	protein-L-isoaspartate (D-aspartate) O-methyltransferase (332) ;mRNA; r:7179857-7184843
Esi0113_0005	-15247.7	-15251.4	0.00709403	THO complex, subunitTHOC2, C-terminal (2368) ;mRNA; r:163706-191438
Esi0309_0028	-859.143	-868.606	1.3586e-05	beta-hydroxyacyl-ACP dehydratase (232) ;mRNA; f:917951-920214
Esi0193_0059	-2806.25	-2809.89	0.00696309	Alpha/Beta hydrolase fold (284) ;mRNA; f:979386-985570
Esi0110_0022	-7683.21	-7685.32	0.0398502	Vesicle transport protein, Use1 (884) ;mRNA; f:6110401-6119792
Esi0337_0035	-2710.02	-2712.19	0.0371511	PLP-binding barrel (315) ;mRNA; f:2702704-2706429
Esi0104_0047	-5529.5	-5537.56	5.9427e-05	Urea/Na+ high-affinity symporter (690) ;mRNA; r:3387394-3410912
Esi0125_0070	-3474.99	-3478.65	0.00678765	SET domain (402) ;mRNA; f:4603834-4607860
Esi0116_0037	-2691.4	-2693.5	0.0402481	LanC lantibiotic synthetase component C-like 2 (611) ;mRNA; r:2232158-2246074
Esi0217_0013	-3559.79	-3563.81	0.00461086	General transcription factor II H, polypeptide 2 (413) ;mRNA; f:3338258-3343947
Esi0047_0061	-2889.14	-2896.03	0.000205843	putative serine esterase (487) ;mRNA; r:2271718-2274529
Esi0006_0107	-4241.03	-4244.63	0.00729198	CRAL-TRIO domain (418) ;mRNA; f:5708921-5713143
Esi0082_0007	-4814.14	-4816.3	0.0376513	Lycopene cyclase (541) ;mRNA; f:5769822-5783463
Esi0122_0031	-7889.92	-7901.37	1.695e-06	Raptor (929) ;mRNA; f:135112-144247
Esi0071_0020	-1310.73	-1321	5.85e-06	Proteasome alpha-subunit, N-terminal domain (240) ;mRNA; f:4749183-4754279
Esi0467_0005	-16014.7	-16019.2	0.0027248	Target of rapamycin 1 (3332) ;mRNA; f:368334-431637
Esi0099_0034	-3225.04	-3227.49	0.0270452	WD40 repeat (450) ;mRNA; r:3911068-3919720
Esi0035_0124	-4709.29	-4714.44	0.00134033	Phosphorylated CTD interacting factor 1, WW domain (772) ;mRNA; f:3080660-3088092
Esi0048_0061	-14314.5	-14321.2	0.00024349	Zinc finger, N-recognin (2759) ;mRNA; r:2947035-2975742
Esi0279_0027	-1996.14	-1998.24	0.0405568	AMMECR1 domain (241) ;mRNA; r:760892-764092
Esi0002_0034	-2555.38	-2557.33	0.0485895	filamentous temperature sensitive Z (481) ;mRNA; f:7044345-7052742
Esi0144_0003	-8111.78	-8113.75	0.0472857	conserved unknown protein (867) ;mRNA; r:2097116-2100787
Esi0098_0012	-1176.48	-1179.84	0.0095909	photosystem II 12 kDa extrinsic protein (159) ;mRNA; f:564498-568005

## Sheet: table S5
Table S5. KEGG annotation results of E. siliculosus and S. japonica specific GUPS (genes under positive selection) (only genes number more than five are displayed)
E.siliculosus				GUPS No.	S.japonica				GUPS No.
Metabolic pathways				37	Metabolic pathways				48
Biosynthesis of secondary metabolites				23	Biosynthesis of secondary metabolites				19
Biosynthesis of antibiotics				15	Biosynthesis of antibiotics				14
Carbon metabolism				9	Biosynthesis of amino acids				10
Biosynthesis of amino acids				8	Purine metabolism				9
Glyoxylate and dicarboxylate				5	Pyrimidine metabolism				7
Metabolism				5	Carbon metabolism				7
Endocytosis				5	mRNA surveillance pathway				6
Protein processing in endoplasmic reticulum				5	Spliceosome				6
RNA transport				5	DNA replication				5
Spliceosome				5	Cysteine and methionine metabolism				5
					Nucleotide excision repair				5
					RNA transport				5
